# Supplementary material for: Persulfate promoted carbamoylation of N-arylacrylamides and N-arylcinnamamides with 4-carbamoyl-Hantzsch esters
Source: Royal Society of Chemistry journal article supplement (doi:10.1039/d3ob01240a), 2023-01-01

# Persulfate promoted carbamoylation of *N*-arylacrylamides and *N*-arylcinnamamides with 4-carbamoyl-Hantzsch esters

Qi Jing<sup>a,b</sup>, Fu-Ci Qiao<sup>a</sup>, Jing Sun<sup>b\*</sup>, Jing-Yun Wang<sup>a</sup>, Ming-Dong Zhou<sup>a,b\*</sup>

<sup>a</sup> College of Chemical Engineering, Shenyang University of Chemical Technology,  
Shenyang 110142, China

<sup>b</sup> School of Petrochemical Engineering, Liaoning Petrochemical University, Fushun  
113001, China.

## Table of Contents

|                                                  |     |
|--------------------------------------------------|-----|
| 1. General methods .....                         | S2  |
| 2. General procedure for the carbamoylation..... | S2  |
| 3. Characteristic data of compounds .....        | S2  |
| 4. Mechanistic investigations .....              | S13 |
| 5. References .....                              | S14 |
| 6. NMR spectra .....                             | S15 |

## 1. General methods

Unless otherwise noted, all of the reagents were purchased from commercial suppliers and used without purification.  $^1\text{H}$  NMR and  $^{13}\text{C}$  NMR spectra were recorded on a Bruker AVANCE III HD 400 instrument. HRMS (ESI) determinations were carried out on a Bruker Daltonics MicrOTOF II spectrometer. Melting points were determined on a Shanghai Shengguang WRS-3 melting point instrument. The 4-carbamoyl-Hantzsch esters and N-arylacrylamides were prepared according to the published procedures<sup>1-6</sup>.

## 2. General procedure for the carbamoylation

4-Carbamoyl Hantzsch ester **1** (0.24 mmol), N-arylacrylamides **2** or N-arylcinnamamides **4** (0.2 mmol),  $(\text{NH}_4)_2\text{S}_2\text{O}_8$  (0.4 mmol), and  $\text{CH}_3\text{CN-H}_2\text{O}$  (2 mL, v/v, 1:1) were added to a 10 mL Schlenk tube under  $\text{N}_2$ . The mixture was heated at 50 °C for 12 h and then cooled to room temperature. After the reaction was completed, the mixture was concentrated under reduced pressure, the resulting mixture was dissolved with ethyl acetate (5 mL) and washed with  $\text{H}_2\text{O}$  (3 x 5 mL). The organic phase was concentrated under vacuum, the residue was purified by column chromatography on silica gel to give the corresponding products **3** or **5**.

## 3. Characteristic data of compounds

1,3-dimethyl-3-(2-oxo-2-(piperidin-1-yl)ethyl)indolin-2-one (**3a**)<sup>7</sup>

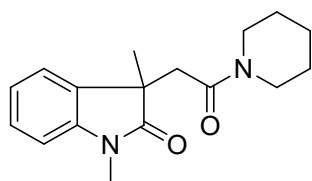

Yield (88%), white solid, mp 140.5-141.3 °C, PE/EA = 3/1 to EA as the eluent;  $^1\text{H}$  NMR (400 MHz,  $\text{CDCl}_3$ )  $\delta$ : 7.25-7.19 (m, 1H), 7.17-7.11 (m, 1H), 7.02-6.96 (m, 1H), 6.84 (d,  $J$  = 8.0 Hz, 1H), 3.38-3.28 (m, 4H), 3.26 (s, 3H), 2.99 (d,  $J$  = 16.0 Hz, 1H), 2.94 (d,  $J$  = 16.0 Hz, 1H), 1.61-1.47 (m, 4H), 1.46-1.35 (m, 2H), 1.34 (s, 3H).

1,3-dimethyl-3-(2-morpholino-2-oxoethyl)indolin-2-one (**3b**)<sup>7</sup>

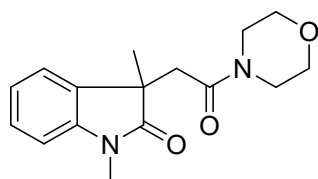

Yield (82%), white solid, mp 180.9-181.2 °C, PE/EA = 3/1 to EA as the eluent;  $^1\text{H}$  NMR (400

MHz, CDCl<sub>3</sub>)  $\delta$ : 7.27-7.22 (m, 1H), 7.17-7.13 (m, 1H), 7.04-6.98 (m, 1H), 6.86 (d,  $J$  = 8.0 Hz, 1H), 3.66-3.48 (m, 4H), 3.48-3.28 (m, 4H), 3.26 (s, 3H), 3.00 (d,  $J$  = 16.0 Hz, 1H), 2.92 (d,  $J$  = 16.0 Hz, 1H), 1.36 (s, 3H).

1,3-dimethyl-3-(2-oxo-2-(pyrrolidin-1-yl)ethyl)indolin-2-one (**3c**)

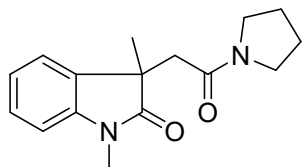

Yield (80%), viscous liquid, PE/EA = 3/1 to EA as the eluent; <sup>1</sup>H NMR (400 MHz, CDCl<sub>3</sub>)  $\delta$ : 7.25-7.19 (m, 1H), 7.18-7.15 (m, 1H), 7.01-6.94 (m, 1H), 6.83 (d,  $J$  = 8.0 Hz, 1H), 3.37-3.27 (m, 3H), 3.25 (s, 3H), 3.23-3.17 (m, 1H), 2.91 (d,  $J$  = 16.0 Hz, 1H), 2.84 (d,  $J$  = 16.0 Hz, 1H), 1.89-1.82 (m, 2H), 1.78-1.70 (m, 2H), 1.36 (s, 3H); <sup>13</sup>C NMR (100 MHz, CDCl<sub>3</sub>)  $\delta$ : 180.8, 167.4, 143.8, 134.1, 127.6, 121.9, 121.7, 108.0, 46.5, 45.6, 45.4, 41.9, 26.3, 26.0, 24.5, 24.2; HRMS (ESI)  $m/z$ : [M+H]<sup>+</sup> calcd for C<sub>16</sub>H<sub>21</sub>N<sub>2</sub>O<sub>2</sub> 273.1598; found 273.1598.

2-(1,3-dimethyl-2-oxoindolin-3-yl)-N,N-diethylacetamide (**3d**)<sup>7</sup>

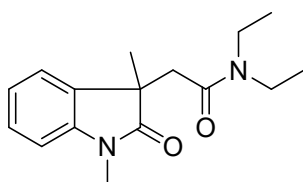

Yield (75%), colorless liquid, PE/EA = 3/1 to EA as the eluent; <sup>1</sup>H NMR (400 MHz, CDCl<sub>3</sub>)  $\delta$ : 7.25-7.18 (m, 1H), 7.17-7.11 (m, 1H), 6.98 (t,  $J$  = 8.0 Hz, 1H), 6.83 (d,  $J$  = 8.0 Hz, 1H), 3.30-3.21 (m, 5H), 3.21-3.11 (m, 2H), 2.96 (d,  $J$  = 16.0 Hz, 1H), 2.91 (d,  $J$  = 16.0 Hz, 1H), 1.36 (s, 3H), 1.14 (t,  $J$  = 8.0 Hz, 3H), 0.90 (t,  $J$  = 8.0 Hz, 3H).

N-cyclopentyl-2-(1,3-dimethyl-2-oxoindolin-3-yl)acetamide (**3e**)<sup>7</sup>

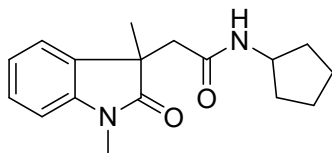

Yield (88%), yellow solid, 118.6-119.2 °C, PE/EA = 3/1 to EA as the eluent; <sup>1</sup>H NMR (400 MHz, CDCl<sub>3</sub>)  $\delta$ : 7.32-7.24 (m, 2H), 7.08 (t,  $J$  = 8.0 Hz, 1H), 6.85 (d,  $J$  = 8.0 Hz, 1H), 6.33 (s, 1H), 4.11-3.98 (m, 1H), 3.24 (s, 3H), 2.75 (d,  $J$  = 16.0 Hz, 1H), 2.62 (d,  $J$  = 16.0 Hz, 1H), 1.92-1.74 (m, 2H), 1.68-1.46 (m, 4H), 1.43 (s, 3H), 1.33-1.17 (m, 2H).

N-cycloheptyl-2-(1,3-dimethyl-2-oxoindolin-3-yl)acetamide (**3f**)<sup>7</sup>

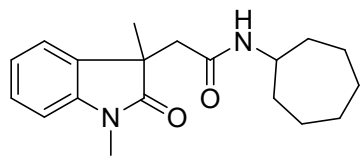

Yield (70%), yellow liquid, PE/EA = 3/1 to EA as the eluent; <sup>1</sup>H NMR (400 MHz, CDCl<sub>3</sub>) δ: 7.28-7.22 (m, 2H), 7.05 (t, *J* = 8.0 Hz, 1H), 6.83 (d, *J* = 8.0 Hz, 1H), 6.21 (d, *J* = 8.0 Hz, 1H), 3.83-3.71 (m, 1H), 3.22 (s, 3H), 2.73 (d, *J* = 16.0 Hz, 1H), 2.59 (d, *J* = 16.0 Hz, 1H), 1.78-1.64 (m, 2H), 1.59-1.45 (m, 6H), 1.43-1.38 (m, 4H), 1.33-1.21 (m, 3H).

2-(1,3-dimethyl-2-oxoindolin-3-yl)-N-hexylacetamide (**3g**)<sup>7</sup>

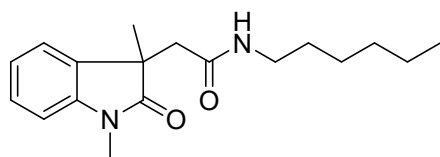

Yield (85%), yellow liquid, PE/EA = 3/1 to EA as the eluent; <sup>1</sup>H NMR (400 MHz, CDCl<sub>3</sub>) δ: 7.30-7.22 (m, 2H), 7.06 (t, *J* = 8.0 Hz, 1H), 6.84 (d, *J* = 8.0 Hz, 1H), 6.32 (s, 1H), 3.23 (s, 3H), 3.13-3.03 (m, 2H), 2.77 (d, *J* = 16.0 Hz, 1H), 2.64 (d, *J* = 16.0 Hz, 1H), 1.41 (s, 3H), 1.38-1.29 (m, 2H), 1.28-1.16 (m, 6H), 0.85 (t, *J* = 8.0 Hz, 3H).

N-benzyl-2-(1,3-dimethyl-2-oxoindolin-3-yl)acetamide (**3h**)<sup>8</sup>

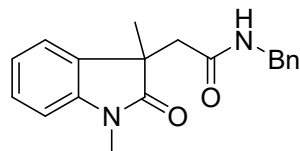

Yield (70%), yellow liquid, PE/EA = 3/1 to EA as the eluent; <sup>1</sup>H NMR (400 MHz, CDCl<sub>3</sub>) δ: 7.31-7.19 (m, 5H), 7.10-6.99 (m, 3H), 6.81 (d, *J* = 8.0 Hz, 1H), 6.60-6.50 (m, 1H), 4.34-4.14 (m, 2H), 3.09 (s, 3H), 2.84 (d, *J* = 16.0 Hz, 1H), 2.68 (d, *J* = 16.0 Hz, 1H), 1.38 (s, 3H).

2-(1,3-dimethyl-2-oxoindolin-3-yl)-N-(1-phenylethyl)acetamide (**3i**)<sup>7</sup>

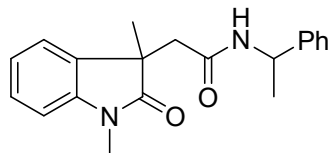

Yield (41%), yellow solid, mp 171.7-172.5 °C, PE/EA = 3/1 to EA as the eluent; <sup>1</sup>H NMR (400 MHz, CDCl<sub>3</sub>) δ: 7.33-7.23 (m, 5H), 7.21-7.15 (m, 2H), 7.08 (t, *J* = 8.0 Hz, 1H), 6.84 (d, *J* = 8.0 Hz, 1H), 6.54 (d, *J* = 8.0 Hz, 1H), 5.03-4.89 (m, 1H), 3.24 (s, 3H), 2.80 (d, *J* = 16.0 Hz, 1H), 2.65 (d, *J* = 16.0 Hz, 1H), 1.38 (s, 3H), 1.34 (d, *J* = 8.0 Hz, 3H).

2-(1,3-dimethyl-2-oxoindolin-3-yl)-N-(furan-2-ylmethyl)acetamide (**3j**)

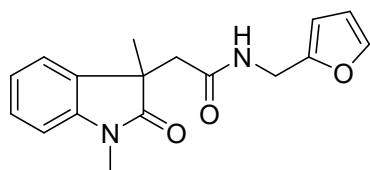

Yield (50%), white solid, mp 100.7-101.1 °C, PE/EA = 3/1 to EA as the eluent; <sup>1</sup>H NMR (400 MHz, CDCl<sub>3</sub>) δ: 7.32-7.28 (m, 1H), 7.28-7.22 (m, 2H), 7.06 (t, *J* = 8.0 Hz, 1H), 6.83 (d, *J* = 8.0 Hz, 1H), 6.65 (s, 1H), 6.29-6.23 (m, 1H), 6.12-6.04 (m, 1H), 4.38-4.20 (m, 2H), 3.18 (s, 3H), 2.80 (d, *J* = 16.0 Hz, 1H), 2.68 (d, *J* = 16.0 Hz, 1H), 1.41 (s, 3H); <sup>13</sup>C NMR (100 MHz, CDCl<sub>3</sub>) δ: 180.5, 168.7, 151.3, 142.8, 141.9, 133.1, 128.1, 122.3, 110.3, 108.3, 107.1, 46.1, 43.6, 36.3, 26.3, 23.5; HRMS (ESI) *m/z*: [M+H]<sup>+</sup> calcd for C<sub>17</sub>H<sub>19</sub>N<sub>2</sub>O<sub>3</sub> 299.1390; found 299.1387.

2-(1,3-dimethyl-2-oxoindolin-3-yl)-N-phenethylacetamide (**3k**)<sup>7</sup>

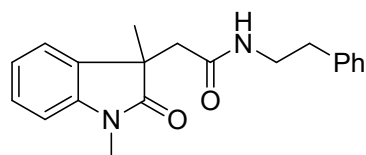

Yield (83%), colorless liquid, PE/EA = 3/1 to EA as the eluent; <sup>1</sup>H NMR (400 MHz, CDCl<sub>3</sub>) δ: 7.30-7.24 (m, 4H), 7.21-7.16 (m, 1H), 7.14-7.09 (m, 2H), 7.09-7.03 (m, 1H), 6.84 (d, *J* = 8.0 Hz, 1H), 6.26 (s, 1H), 3.44-3.27 (m, 2H), 3.21 (s, 3H), 2.76 (d, *J* = 16.0 Hz, 1H), 2.67 (t, *J* = 8.0 Hz, 2H), 2.61 (d, *J* = 16.0 Hz, 1H), 1.38 (s, 3H).

2-(1,3-dimethyl-2-oxoindolin-3-yl)-N-phenylacetamide (**3l**)<sup>8</sup>

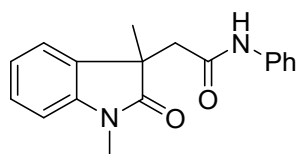

Yield (75%), white solid, mp 98.2-99.1 °C, PE/EA = 3/1 to EA as the eluent; <sup>1</sup>H NMR (400 MHz, CDCl<sub>3</sub>) δ: 8.87 (s, 1H), 7.48 (d, *J* = 8.0 Hz, 2H), 7.34-7.27 (m, 4H), 7.15-7.03 (m, 2H), 6.87 (d, *J* = 8.0 Hz, 1H), 3.26 (s, 3H), 2.91 (d, *J* = 16.0 Hz, 1H), 2.84 (d, *J* = 16.0 Hz, 1H), 1.51 (s, 3H).

2-(1,3-dimethyl-2-oxoindolin-3-yl)-N-(p-tolyl)acetamide (**3m**)<sup>8</sup>

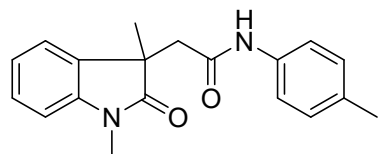

Yield (76%), yellow solid, mp 111.8-112.5 °C, PE/EA = 3/1 to EA as the eluent; <sup>1</sup>H NMR (400

MHz, CDCl<sub>3</sub>)  $\delta$ : 8.73 (s, 1H), 7.37-7.27 (m, 4H), 7.13-7.05 (m, 3H), 6.86 (d,  $J$  = 8.0 Hz, 1H), 3.25 (s, 3H), 2.90 (d,  $J$  = 16.0 Hz, 1H), 2.82 (d,  $J$  = 16.0 Hz, 1H), 2.29 (s, 3H), 1.50 (s, 3H).

2-(1,3-dimethyl-2-oxoindolin-3-yl)-N-(4-(trifluoromethyl)phenyl)acetamide (**3n**)<sup>8</sup>

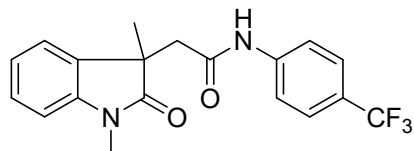

Yield (51%), white solid, mp 72.1-72.9 °C, PE/EA = 3/1 to EA as the eluent; <sup>1</sup>H NMR (400 MHz, CDCl<sub>3</sub>)  $\delta$ : 9.52 (s, 1H), 7.62 (d,  $J$  = 8.0 Hz, 2H), 7.50 (d,  $J$  = 8.0 Hz, 2H), 7.34-7.26 (m, 2H), 7.12 (t,  $J$  = 8.0 Hz, 1H), 6.89 (d,  $J$  = 8.0 Hz, 1H), 3.27 (s, 3H), 2.95 (d,  $J$  = 16.0 Hz, 1H), 2.89 (d,  $J$  = 16.0 Hz, 1H), 1.50 (s, 3H).

3-(cyclopentylmethyl)-1,3-dimethylindolin-2-one (**3o**)<sup>9</sup>

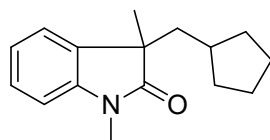

Yield (81%), colorless liquid, PE/EA = 3/1 to EA as the eluent; <sup>1</sup>H NMR (400 MHz, CDCl<sub>3</sub>)  $\delta$ : 7.29-7.22 (m, 1H), 7.18-7.14 (m, 1H), 7.08-7.02 (m, 1H), 6.83 (d,  $J$  = 8.0 Hz, 1H), 3.21 (s, 3H), 2.11-2.00 (m, 1H), 1.92-1.82 (m, 1H), 1.51-1.18 (m, 10H), 1.06-0.94 (m, 1H), 0.89-0.75 (m, 1H).

5-methoxy-1,3-dimethyl-3-(2-oxo-2-(piperidin-1-yl)ethyl)indolin-2-one (**3p**)

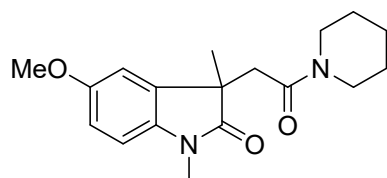

Yield (71%), yellow solid, mp 134.5-135.2 °C, PE/EA = 3/1 to EA as the eluent; <sup>1</sup>H NMR (400 MHz, CDCl<sub>3</sub>)  $\delta$ : 6.78-7.76 (m, 1H), 6.74-6.72 (m, 2H), 3.76 (s, 3H), 3.36-3.30 (m, 4H), 3.23 (s, 3H), 2.98 (d,  $J$  = 16.0 Hz, 1H), 2.90 (d,  $J$  = 16.0 Hz, 1H), 1.59-1.47 (m, 4H), 1.43-1.33 (m, 2H), 1.32 (s, 3H); <sup>13</sup>C NMR (100 MHz, CDCl<sub>3</sub>)  $\delta$ : 180.5, 166.9, 155.5, 137.4, 135.9, 110.9, 109.9, 108.0, 55.6, 46.5, 46.0, 42.5, 40.5, 26.4, 26.2, 25.3, 25.0, 24.3; HRMS (ESI) calcd for C<sub>18</sub>H<sub>25</sub>N<sub>2</sub>O<sub>3</sub><sup>+</sup>: [M+H]<sup>+</sup> 317.1860, found: 317.1860.

1,3,5-trimethyl-3-(2-oxo-2-(piperidin-1-yl)ethyl)indolin-2-one (**3q**)<sup>7</sup>

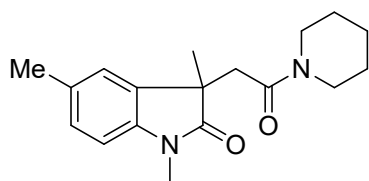

Yield (81%), white solid, mp 112.3-112.8 °C, PE/EA = 3/1 to EA as the eluent; <sup>1</sup>H NMR (400 MHz, CDCl<sub>3</sub>) δ: 7.02 (d, *J* = 8.0 Hz, 1H), 6.95 (s, 1H), 6.72 (d, *J* = 8.0 Hz, 1H), 3.42-3.26 (m, 4H), 3.23 (s, 3H), 2.97 (d, *J* = 16.0 Hz, 1H), 2.91 (d, *J* = 16.0 Hz, 1H), 2.30 (s, 3H), 1.60-1.46 (m, 4H), 1.45-1.34 (m, 2H), 1.33 (s, 3H).

5-fluoro-1,3-dimethyl-3-(2-oxo-2-(piperidin-1-yl)ethyl)indolin-2-one (**3r**)<sup>7</sup>

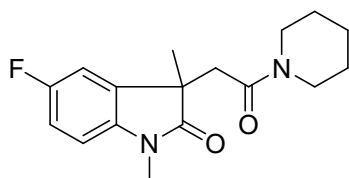

Yield (70%), yellow solid, mp 115.4-116.2 °C, PE/EA = 3/1 to EA as the eluent; <sup>1</sup>H NMR (400 MHz, CDCl<sub>3</sub>) δ: 6.95-6.87 (m, 2H), 6.78-6.72 (m, 1H), 3.40-3.28 (m, 4H), 3.25 (s, 3H), 3.02 (d, *J* = 16.0 Hz, 1H), 2.92 (d, *J* = 16.0 Hz, 1H), 1.62-1.48 (m, 4H), 1.48-1.34 (m, 2H), 1.33 (s, 3H); <sup>19</sup>F NMR (376 MHz, CDCl<sub>3</sub>) δ: -121.7.

5-chloro-1,3-dimethyl-3-(2-oxo-2-(piperidin-1-yl)ethyl)indolin-2-one (**3s**)<sup>7</sup>

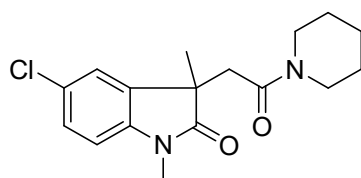

Yield (86%), white solid, mp 131.5-132.2 °C, PE/EA = 3/1 to EA as the eluent; <sup>1</sup>H NMR (400 MHz, CDCl<sub>3</sub>) δ: 7.22-7.16 (m, 1H), 7.08 (d, *J* = 2.0 Hz, 1H), 6.76 (d, *J* = 8.4 Hz, 1H), 3.41-3.28 (m, 4H), 3.24 (s, 3H), 3.03 (d, *J* = 16.0 Hz, 1H), 2.92 (d, *J* = 16.0 Hz, 1H), 1.64-1.48 (m, 4H), 1.46-1.34 (m, 2H), 1.32 (s, 3H).

1,3,7-trimethyl-3-(2-oxo-2-(piperidin-1-yl)ethyl)indolin-2-one (**3u**)<sup>7</sup>

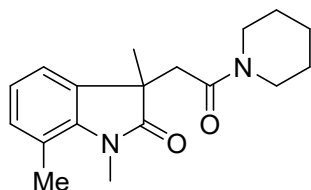

Yield (75%), colorless liquid, PE/EA = 3/1 to EA as the eluent;  $^1\text{H NMR}$  (400 MHz,  $\text{CDCl}_3$ )  $\delta$ : 6.96-6.91 (m, 2H), 6.89-6.83 (m, 1H), 3.54 (s, 3H), 3.40-3.28 (m, 4H), 3.00 (d,  $J = 16.0$  Hz, 1H), 2.93 (d,  $J = 16.0$  Hz, 1H), 2.58 (s, 3H), 1.60-1.47 (m, 4H), 1.45-1.32 (m, 2H), 1.30 (s, 3H).

1,3,4-trimethyl-3-(2-oxo-2-(piperidin-1-yl)ethyl)indolin-2-one and 1,3,6-trimethyl-3-(2-oxo-2-(piperidin-1-yl)ethyl)indolin-2-one (**3v** + **3v'**)<sup>7</sup>

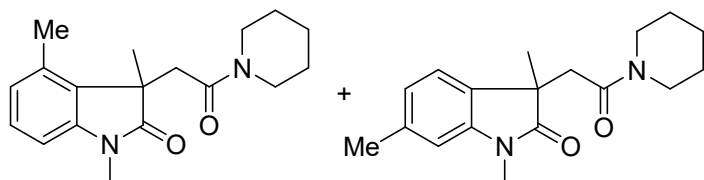

Yield (85%), colorless liquid, PE/EA = 3/1 to EA as the eluent;  $^1\text{H NMR}$  (400 MHz,  $\text{CDCl}_3$ )  $\delta$ : 7.13 (t,  $J = 8.0$  Hz, 0.66H), 7.02 (d,  $J = 7.6$  Hz, 0.34H), 6.80 (d,  $J = 7.6$  Hz, 0.34H), 6.75 (d,  $J = 7.6$  Hz, 0.67H), 6.72-6.65 (m, 1H), 3.42-3.27 (m, 4H), 3.24 (s, 3H), 3.20 (d,  $J = 16.8$  Hz, 0.65H), 3.06 (d,  $J = 16.8$  Hz, 0.65H), 2.98 (d,  $J = 16.4$  Hz, 0.35H), 2.92 (d,  $J = 16.4$  Hz, 0.35H), 2.35 (s, 1H), 2.33 (s, 2H), 1.61-1.46 (m, 4H), 1.43-1.30 (m, 5H).

7-chloro-1,3-dimethyl-3-(2-oxo-2-(piperidin-1-yl)ethyl)indolin-2-one (**3w**)<sup>7</sup>

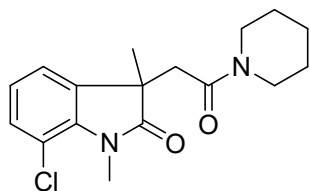

Yield (51%), viscous liquid, PE/EA = 3/1 to EA as the eluent;  $^1\text{H NMR}$  (400 MHz,  $\text{CDCl}_3$ )  $\delta$ : 7.14-7.08 (m, 1H), 6.98-6.94 (m, 1H), 6.87 (t,  $J = 8.0$  Hz, 1H), 3.62 (s, 3H), 3.39-3.27 (m, 4H), 3.04 (d,  $J = 16.4$  Hz, 1H), 2.93 (d,  $J = 16.4$  Hz, 1H), 1.59-1.47 (m, 4H), 1.45-1.31 (m, 2H), 1.29 (s, 3H).

4-chloro-1,3-dimethyl-3-(2-oxo-2-(piperidin-1-yl)ethyl)indolin-2-one and 6-chloro-1,3-dimethyl-3-(2-oxo-2-(piperidin-1-yl)ethyl)indolin-2-one (**3x**+**3x'**)<sup>7</sup>

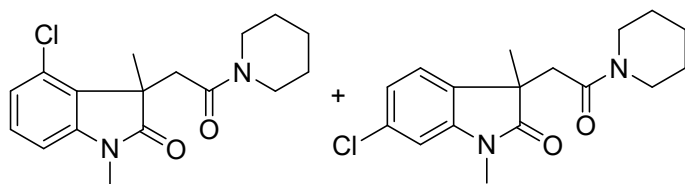

Yield (70%), colorless liquid, PE/EA = 3/1 to EA as the eluent;  $^1\text{H NMR}$  (400 MHz,  $\text{CDCl}_3$ )  $\delta$ : 7.15 (t,  $J = 7.6$  Hz, 0.81H), 7.03 (d,  $J = 8.0$  Hz, 0.19H), 6.96-6.02 (m, 0.19H), 6.91-6.85 (m, 0.80H), 6.82 (d,  $J = 2.0$  Hz, 0.19H), 6.76-6.71 (m, 0.81H), 3.62 (d,  $J = 16.4$  Hz, 0.83H), 3.48-3.29



(m, 3H), 3.27-3.18 (m, 4H), 3.00 (d,  $J = 16.4$  Hz, 0.22H), 2.98 (d,  $J = 16.4$  Hz, 0.83H), 2.93 (d,  $J = 16.4$  Hz, 0.22H), 1.61-1.48 (m, 4H), 1.46-1.28 (m, 5H).

1,3-dimethyl-3-(2-oxo-2-(piperidin-1-yl)ethyl)-1H-pyrrolo[2,3-b]pyridin-2(3H)-one (**3y**)<sup>7</sup>

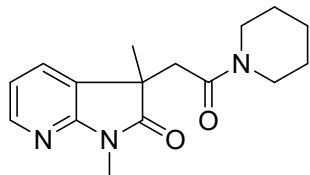

Yield (75%), colorless liquid, PE/EA = 3/1 to EA as the eluent; <sup>1</sup>H NMR (400 MHz, CDCl<sub>3</sub>)  $\delta$ : 8.15-8.11 (m, 1H), 7.42-7.38 (m, 1H), 6.89-6.85 (m, 1H), 3.37-3.30 (m, 7H), 3.00 (d,  $J = 16.4$  Hz, 1H), 2.94 (d,  $J = 16.4$  Hz, 1H), 1.60-1.47 (m, 4H), 1.46-1.37 (m, 2H), 1.36 (s, 3H).

1-methyl-1-(2-oxo-2-(piperidin-1-yl)ethyl)-5,6-dihydro-1H-pyrrolo[3,2,1-ij]quinolin-2(4H)-one (**3z**)

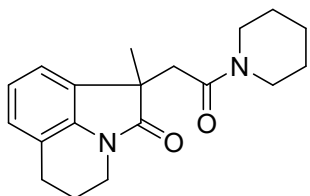

Yield (88%), colorless liquid, PE/EA = 3/1 to EA as the eluent; <sup>1</sup>H NMR (400 MHz, CDCl<sub>3</sub>)  $\delta$ : 7.05-6.94 (m, 2H), 6.91-6.84 (m, 1H), 3.80-3.71 (m, 2H), 3.40-3.30 (m, 4H), 2.94 (s, 2H), 2.87-2.69 (m, 2H), 2.12-1.92 (m, 2H), 1.60-1.50 (m, 4H), 1.49-1.39 (m, 2H), 1.37 (s, 3H); <sup>13</sup>C NMR (100 MHz, CDCl<sub>3</sub>)  $\delta$ : 179.7, 167.2, 139.5, 132.8, 126.5, 121.4, 119.8, 119.7, 47.0, 46.6, 42.5, 40.2, 38.8, 26.3, 25.4, 24.6, 24.3, 21.2; HRMS (ESI)  $m/z$ : [M+H]<sup>+</sup> calcd for C<sub>19</sub>H<sub>25</sub>N<sub>2</sub>O<sub>2</sub> 313.1911; found 313.1910.

1-ethyl-3-methyl-3-(2-oxo-2-(piperidin-1-yl)ethyl)indolin-2-one (**3ab**)<sup>7</sup>

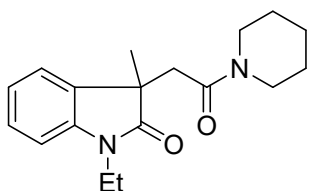

Yield (82%), colorless liquid, PE/EA = 3/1 to EA as the eluent; <sup>1</sup>H NMR (400 MHz, CDCl<sub>3</sub>)  $\delta$ : 7.24-7.12 (m, 2H), 6.97 (t,  $J = 7.6$  Hz, 1H), 6.85 (d,  $J = 7.6$  Hz, 1H), 3.90-3.70 (m, 2H), 3.42-3.23 (m, 4H), 2.95 (s, 2H), 1.59-1.45 (m, 4H), 1.45-1.35 (m, 2H), 1.34 (s, 3H), 1.28 (t,  $J = 7.2$  Hz, 3H).

3-methyl-3-(2-oxo-2-(piperidin-1-yl)ethyl)-1-phenylindolin-2-one (**3ac**)<sup>7</sup>

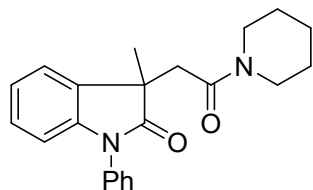

Yield (79%), white solid, mp 88.9-89.5 °C, PE/EA = 3/1 to EA as the eluent; <sup>1</sup>H NMR (400 MHz, CDCl<sub>3</sub>) δ: 7.57-7.45 (m, 4H), 7.42-7.33 (m, 1H), 7.22-7.11 (m, 2H), 7.06-6.98 (m, 1H), 6.81 (d, *J* = 7.6 Hz, 1H), 3.44-3.31 (m, 4H), 3.12 (d, *J* = 16.4 Hz, 1H), 3.05 (d, *J* = 16.0 Hz, 1H), 1.62-1.50 (m, 4H), 1.48-1.36 (m, 5H).

1-benzyl-3-methyl-3-(2-oxo-2-(piperidin-1-yl)ethyl)indolin-2-one (**3ad**)<sup>7</sup>

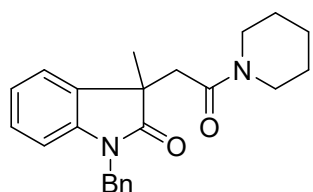

Yield (72%), white solid, mp 133.1-133.8 °C, PE/EA = 3/1 to EA as the eluent; <sup>1</sup>H NMR (400 MHz, CDCl<sub>3</sub>) δ: 7.39-7.34 (m, 2H), 7.33-7.28 (m, 2H), 7.25-7.20 (m, 1H), 7.19-7.16 (m, 1H), 7.13-7.08 (m, 1H), 7.00-6.94 (m, 1H), 6.69 (d, *J* = 8.0 Hz, 1H), 5.12 (d, *J* = 16.0 Hz, 1H), 4.85 (d, *J* = 16.0 Hz, 1H), 3.41-3.34 (m, 4H), 3.09 (d, *J* = 16.0 Hz, 1H), 3.02 (d, *J* = 16.0 Hz, 1H), 1.62-1.53 (m, 2H), 1.51-1.44 (m, 4H), 1.43 (s, 3H).

1-methyl-4-phenyl-3-(piperidine-1-carbonyl)-3,4-dihydroquinolin-2(1*H*)-one (**5a**)

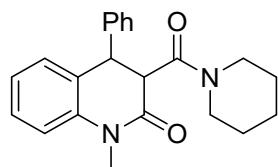

Yield (56%), white solid, mp 196.9-197.3 °C, PE/EA = 3/1 to EA as the eluent; <sup>1</sup>H NMR (400 MHz, CDCl<sub>3</sub>) δ: 7.36-7.29 (m, 2H), 7.29-7.20 (m, 4H), 7.03 (d, *J* = 8.0 Hz, 1H), 6.95 (t, *J* = 7.6 Hz, 1H), 6.79 (d, *J* = 7.6 Hz, 1H), 4.74 (d, *J* = 10.8 Hz, 1H), 4.20 (d, *J* = 10.8 Hz, 1H), 3.69-3.57 (m, 1H), 3.48-3.31 (m, 5H), 3.30-3.21 (m, 1H), 1.64-1.44 (m, 4H), 1.22-1.08 (m, 2H); <sup>13</sup>C NMR (100 MHz, CDCl<sub>3</sub>) δ: 166.7, 166.3, 140.2, 139.4, 128.7, 128.6, 128.2, 127.7, 127.2, 123.1, 114.5, 50.7, 47.3, 45.1, 43.2, 29.9, 26.3, 25.4, 24.4; HRMS (ESI) *m/z*: [M+H]<sup>+</sup> calcd for C<sub>22</sub>H<sub>25</sub>N<sub>2</sub>O<sub>2</sub> 349.1911; found 313.1911.

1-methyl-3-(piperidine-1-carbonyl)-4-(p-tolyl)-3,4-dihydroquinolin-2(1H)-one (**5b**)

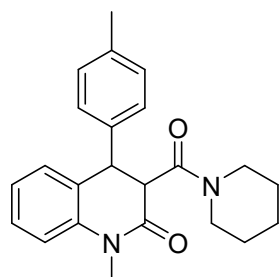

Yield (48%), yellow solid, mp 163.8-164.9 °C, PE/EA = 3/1 to EA as the eluent; <sup>1</sup>H NMR (400 MHz, CDCl<sub>3</sub>) δ: 7.28-7.24 (m, 1H), 7.16-7.08 (m, 4H), 7.03 (d, *J* = 8.0 Hz, 1H), 6.95 (t, *J* = 7.6 Hz, 1H), 6.81 (d, *J* = 7.6 Hz, 1H), 4.69 (d, *J* = 8.0 Hz, 1H), 4.18 (d, *J* = 8.0 Hz, 1H), 3.69-3.57 (m, 1H), 3.48-3.38 (m, 5H), 3.35-3.27 (m, 1H), 2.33 (s, 3H), 1.60-1.52 (m, 4H), 1.28-1.21 (m, 2H); <sup>13</sup>C NMR (100 MHz, CDCl<sub>3</sub>) δ: 166.8, 166.4, 139.4, 137.1, 136.8, 129.4, 128.5, 128.4, 128.3, 127.6, 123.1, 114.4, 50.7, 47.3, 44.6, 43.2, 29.9, 26.2, 25.4, 24.4, 21.0; HRMS (ESI) *m/z*: [M+H]<sup>+</sup> calcd for C<sub>23</sub>H<sub>27</sub>N<sub>2</sub>O<sub>2</sub> 363.2067; found 363.2069.

4-(4-bromophenyl)-1-methyl-3-(piperidine-1-carbonyl)-3,4-dihydroquinolin-2(1H)-one (**5c**)

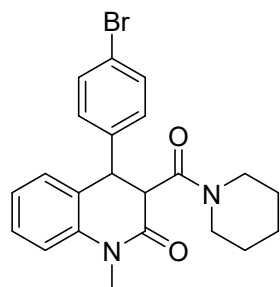

Yield (48%), yellow solid, mp 185.6-186.4 °C, PE/EA = 3/1 to EA as the eluent; <sup>1</sup>H NMR (400 MHz, CDCl<sub>3</sub>) δ: 7.48-7.46 (m, 2H), 7.30-7.26 (m, 1H), 7.12 (d, *J* = 8.0 Hz, 2H), 7.04 (d, *J* = 8.0 Hz, 1H), 6.96 (t, *J* = 8.0 Hz, 1H), 6.73 (d, *J* = 8.0 Hz, 1H), 4.74 (d, *J* = 10.2 Hz, 1H), 4.15 (d, *J* = 10.2 Hz, 1H), 3.62-3.54 (m, 1H), 3.48-3.31 (m, 5H), 3.30-3.21 (m, 1H), 1.64-1.50 (m, 4H), 1.26-1.20 (m, 2H); <sup>13</sup>C NMR (100 MHz, CDCl<sub>3</sub>) δ: 166.4, 166.0, 139.4, 139.3, 131.8, 130.5, 128.0, 127.9, 127.8, 123.2, 121.1, 114.6, 50.5, 47.3, 44.4, 43.3, 30.0, 26.3, 25.5, 24.4; HRMS (ESI) *m/z*: [M+H]<sup>+</sup> calcd for C<sub>22</sub>H<sub>24</sub>BrN<sub>2</sub>O<sub>2</sub> 427.1016; found 427.1011.

6-fluoro-1-methyl-4-phenyl-3-(piperidine-1-carbonyl)-3,4-dihydroquinolin-2(1H)-one (**5d**)

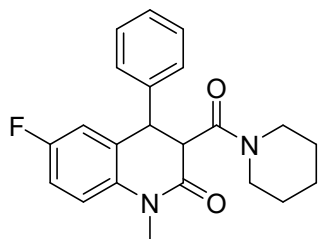

Yield (48%), yellow solid, mp 154.2-155.1 °C, PE/EA = 3/1 to EA as the eluent; <sup>1</sup>H NMR (400 MHz, CDCl<sub>3</sub>) δ: 7.38-7.32 (m, 2H), 7.30-7.27 (m, 1H), 7.22-7.18 (m, 2H), 6.97-6.95 (m, 2H), 6.58-6.50 (m, 1H), 4.72 (d, *J* = 8.0 Hz, 1H), 4.19 (d, *J* = 8.0 Hz, 1H), 3.69-3.61 (m, 1H), 3.48-3.40 (m, 5H), 3.34-3.26 (m, 1H), 1.56-1.50 (m, 4H), 1.22-1.14 (m, 2H); <sup>13</sup>C NMR (100 MHz, CDCl<sub>3</sub>) δ: 166.3, 166.1, 158.8 (d, *J* = 242.0 Hz), 139.6, 135.7 (d, *J* = 2.0 Hz), 130.6 (d, *J* = 7.0 Hz), 128.9, 128.6, 127.5, 115.7 (d, *J* = 8.0 Hz), 115.5 (d, *J* = 25.0 Hz), 114.0 (d, *J* = 22.0 Hz), 50.5, 47.4, 45.1, 43.3, 30.2, 26.2, 25.5, 24.4; HRMS (ESI) *m/z*: [M+H]<sup>+</sup> calcd for C<sub>22</sub>H<sub>24</sub>FN<sub>2</sub>O<sub>2</sub> 367.1816; found 367.1819.

6-chloro-1-methyl-4-phenyl-3-(piperidine-1-carbonyl)-3,4-dihydroquinolin-2(1H)-one (**5e**)

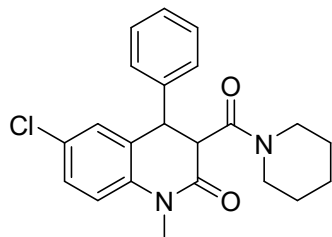

Yield (26%), white solid, mp 162.3-162.9 °C, PE/EA = 3/1 to EA as the eluent; <sup>1</sup>H NMR (400 MHz, CDCl<sub>3</sub>) δ: 7.38-7.32 (m, 2H), 7.30-7.28 (m, 1H), 7.25-7.17 (m, 3H), 6.96 (d, *J* = 8.0 Hz, 1H), 6.82-6.78 (m, 1H), 4.69 (d, *J* = 8.0 Hz, 1H), 4.17 (d, *J* = 8.0 Hz, 1H), 3.69-3.57 (m, 1H), 3.48-3.41 (m, 5H), 3.34-3.26 (m, 1H), 1.55-1.47 (m, 4H), 1.22-1.12 (m, 2H); <sup>13</sup>C NMR (100 MHz, CDCl<sub>3</sub>) δ: 166.3, 166.1, 139.6, 138.1, 130.0, 129.0, 128.6, 128.5, 128.3, 127.7, 127.6, 115.8, 50.6, 47.4, 45.1, 43.4, 30.0, 26.2, 25.5, 24.4; HRMS (ESI) *m/z*: [M+H]<sup>+</sup> calcd for C<sub>22</sub>H<sub>24</sub>ClN<sub>2</sub>O<sub>2</sub> 383.1521; found 383.1517.

## 4. Mechanistic Investigations

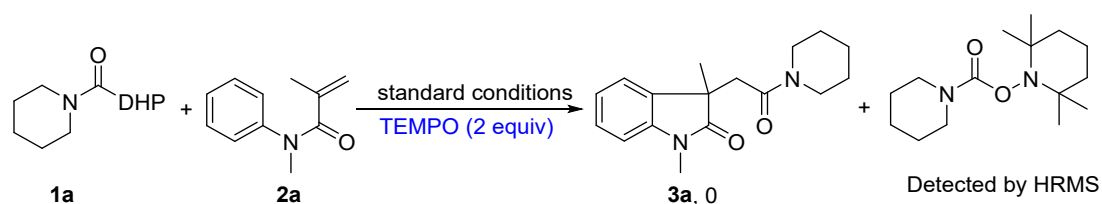

**1a** (0.24 mmol), **2a** (0.2 mmol),  $(\text{NH}_4)_2\text{S}_2\text{O}_8$  (0.4 mmol), TEMPO (0.4 mmol), and degassed  $\text{CH}_3\text{CN-H}_2\text{O}$  (2 mL, 1:1, v/v) were added to a 10 mL Schlenk tube under  $\text{N}_2$ . The mixture was heated at 50 °C for 12 h and then cooled to room temperature. After the reaction was completed, the reaction mixture was monitored by TLC, and no desired product was observed. Then the mixture was concentrated under reduced pressure, the resulting mixture was dissolved with ethyl acetate (5 mL) and washed with  $\text{H}_2\text{O}$  (3 x 5 mL). The organic phase was concentrated under vacuum, the residue was measured by HRMS. The HRMS below indicated the formation of carbamoyl-TEMPO adduct.

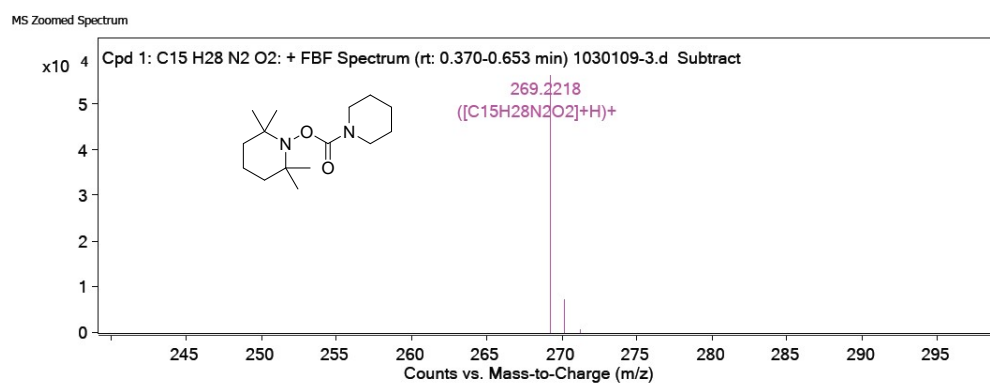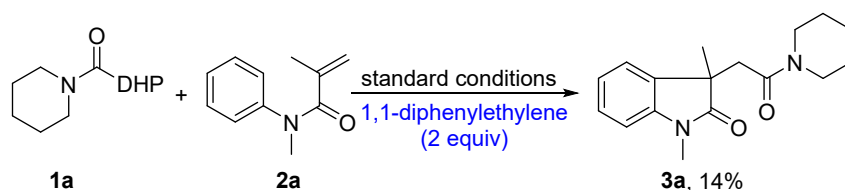

**1a** (0.24 mmol), **2a** (0.2 mmol),  $(\text{NH}_4)_2\text{S}_2\text{O}_8$  (0.4 mmol), 1,1-diphenylethylene (0.4 mmol), and degassed  $\text{CH}_3\text{CN-H}_2\text{O}$  (2 mL, 1:1, v/v) were added to a 10 mL Schlenk tube under  $\text{N}_2$ . The mixture was heated at 50 °C for 12 h and then cooled to room temperature. After the reaction was completed, the mixture was concentrated under reduced pressure, the resulting mixture was dissolved with ethyl acetate (5 mL) and washed with  $\text{H}_2\text{O}$  (3 x 5 mL). The organic phase was concentrated under vacuum, the yield was determined by  $^1\text{H}$  NMR with  $\text{CH}_2\text{Br}_2$  as internal standard.

## 5. References

- (1) N. Alandini , L. Buzzetti, G. Favi, T. Schulte, L. Candish, K.D. Collins, P. Melchiorre. *Angew. Chem. Int. Ed.* 2020, 59, 5248-5253.
- (2) L. Cardinale, M. O. Konev, A. J. Wangelin. *Chem. Eur. J.* 2020, 26, 8239-8243.
- (3) B.T. Matsuo, P.H.R. Pliveira, J.T.M. Correia, M.W. Paixão. *Org. Lett.* 2021, 23, 6775-6779.
- (4) L. Cardinale, M.W.S. Schmotz, M.O. Konev. A. J. Wangelin. *Org. Lett.* 2022, 24, 506-510.
- (5) D.C. Fabry, M. Stodulski, D.C.S. Hoerner, T. Gulder. *Chem. Eur. J.* 2012, 18, 10834-10838.
- (6) Z. He, J. Guo, S. Tian. *Adv. Synth. Catal.* 2018, 360, 1544-1548.
- (7) Q. Gao, Q. Jing, Y. Chen, J. Sun, M. Zhou. *Chin. J. Org. Chem.* 2022, 42, 257-265.
- (8) Z. He, J. Guo, S. Tian. *Adv. Synth. Catal.* 2018, 360, 1544-1548.
- (9) K. Muralirajan, R. Kancherla, A. Gimnkhan, R. Magnus. *Org. Lett.* 2021, 23, 6905-6910.

## 6. NMR spectra

<sup>1</sup>H NMR (400 MHz, CDCl<sub>3</sub>) spectra of **3a**

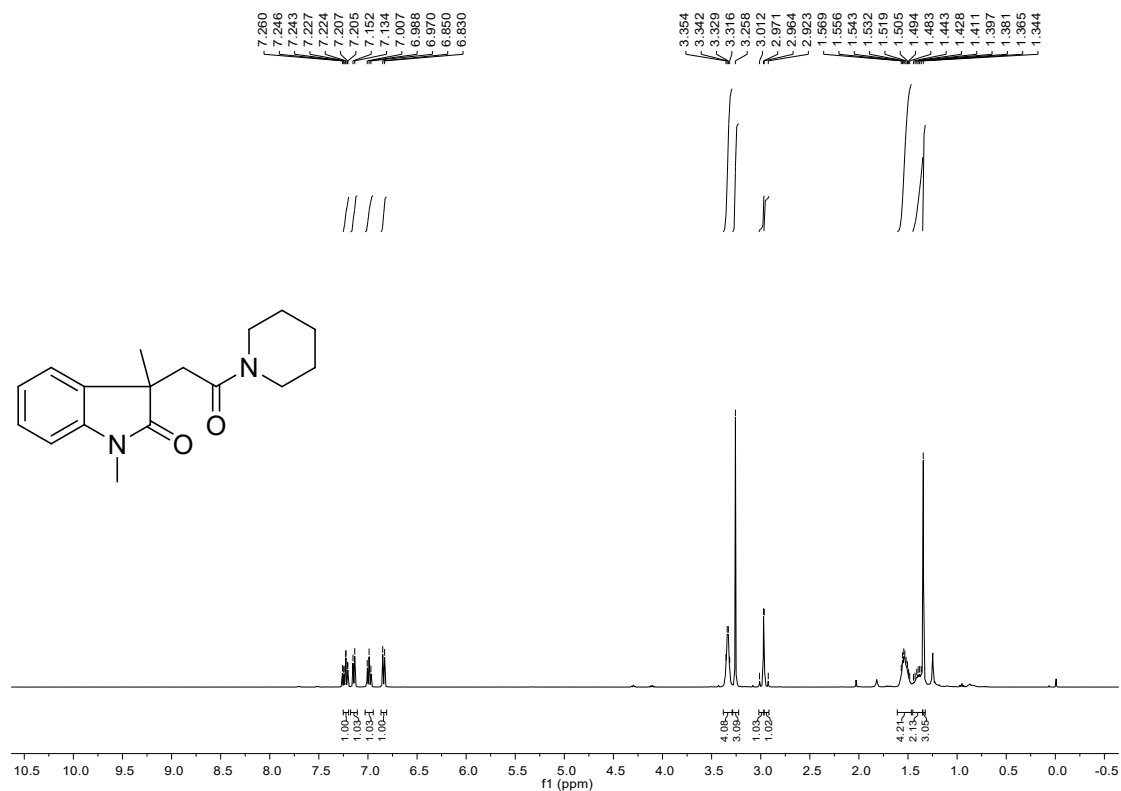

<sup>1</sup>H NMR (400 MHz, CDCl<sub>3</sub>) spectra of **3b**

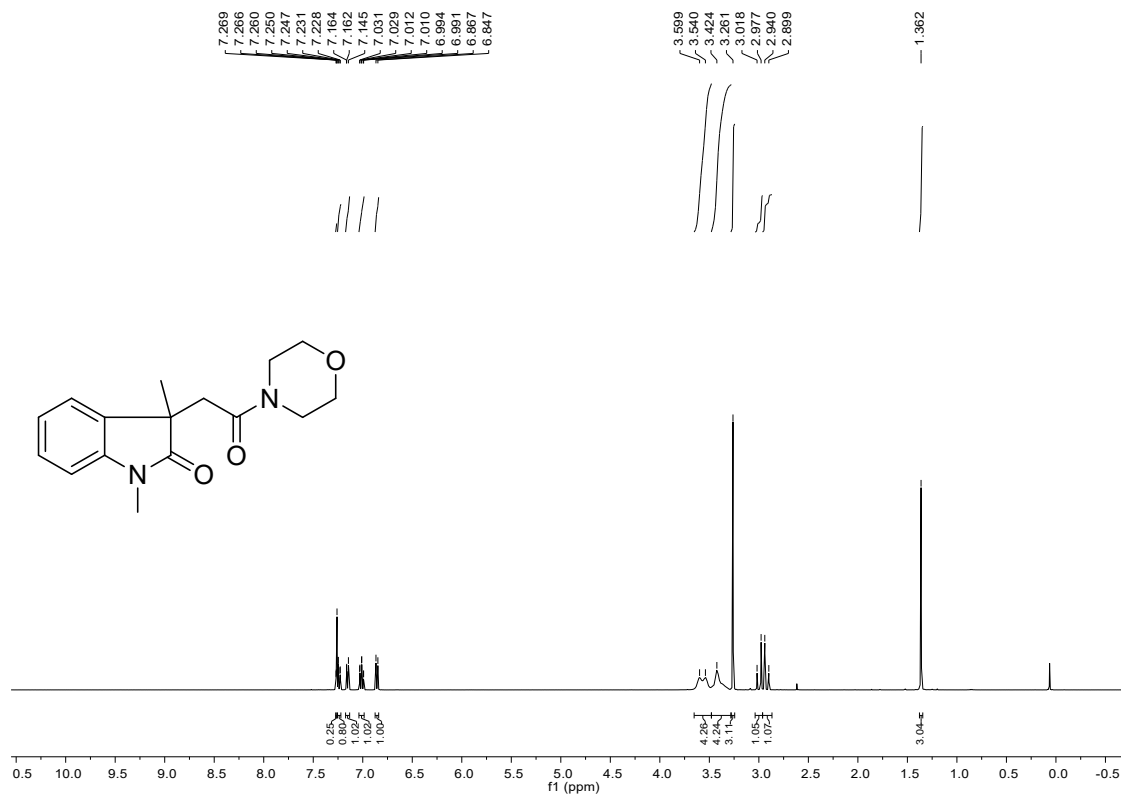

<sup>1</sup>H NMR (400 MHz, CDCl<sub>3</sub>) spectra of **3c**

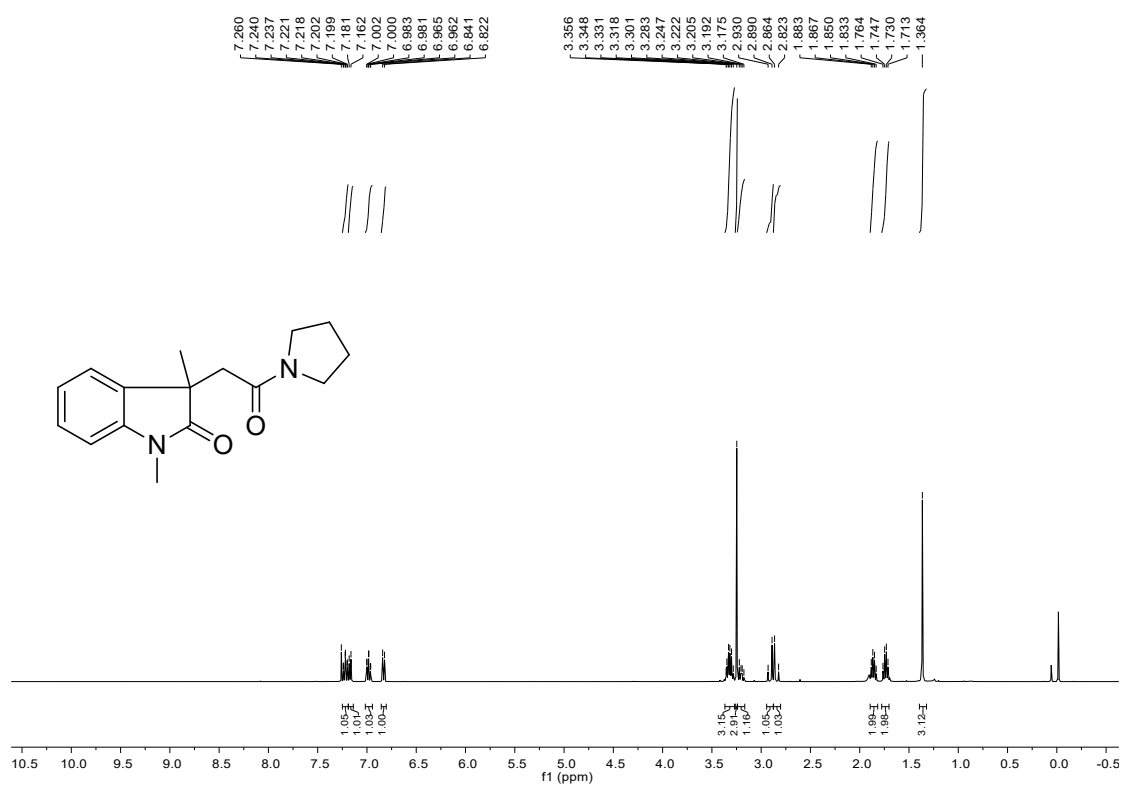

<sup>13</sup>C NMR (100 MHz, CDCl<sub>3</sub>) spectra of **3c**

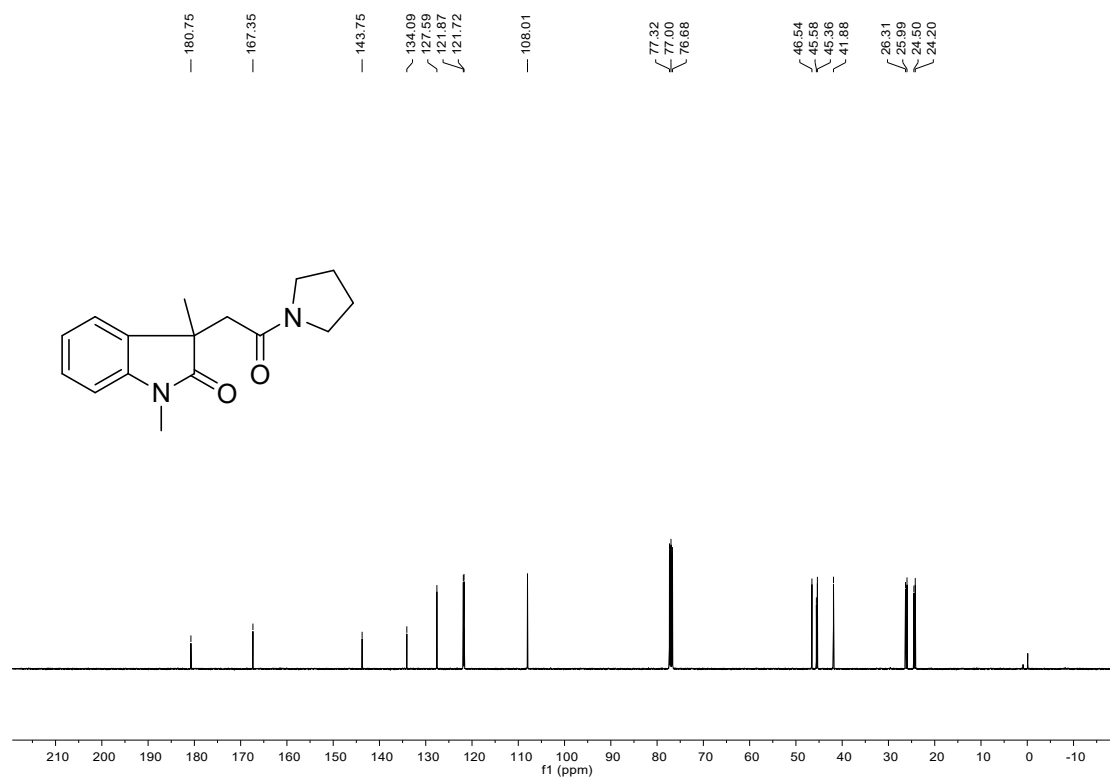



<sup>1</sup>H NMR (400 MHz, CDCl<sub>3</sub>) spectra of **3d**

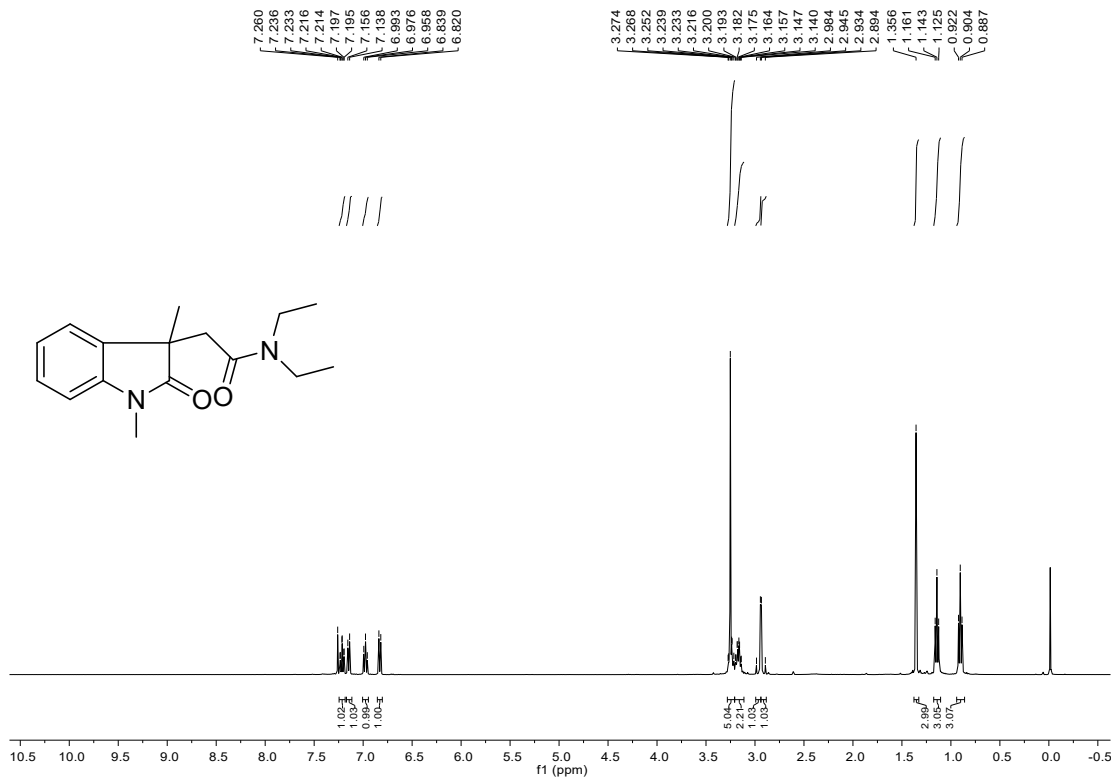

<sup>1</sup>H NMR (400 MHz, CDCl<sub>3</sub>) spectra of **3e**

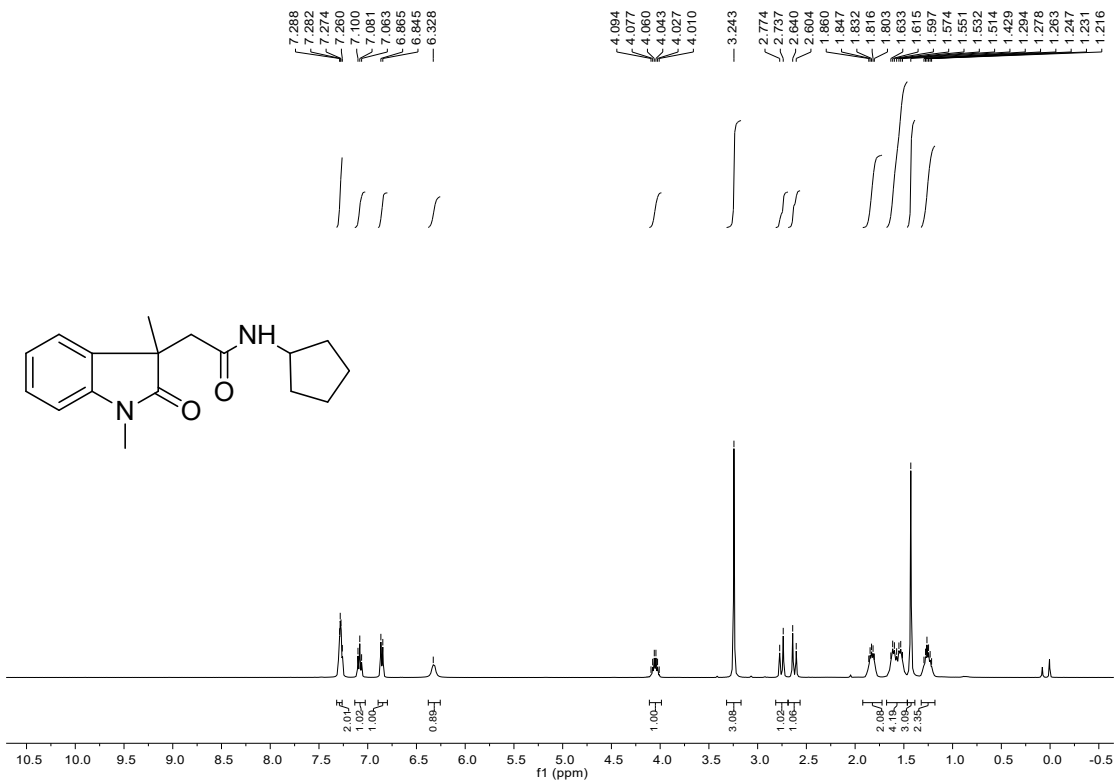

<sup>1</sup>H NMR (400 MHz, CDCl<sub>3</sub>) spectra of **3f**

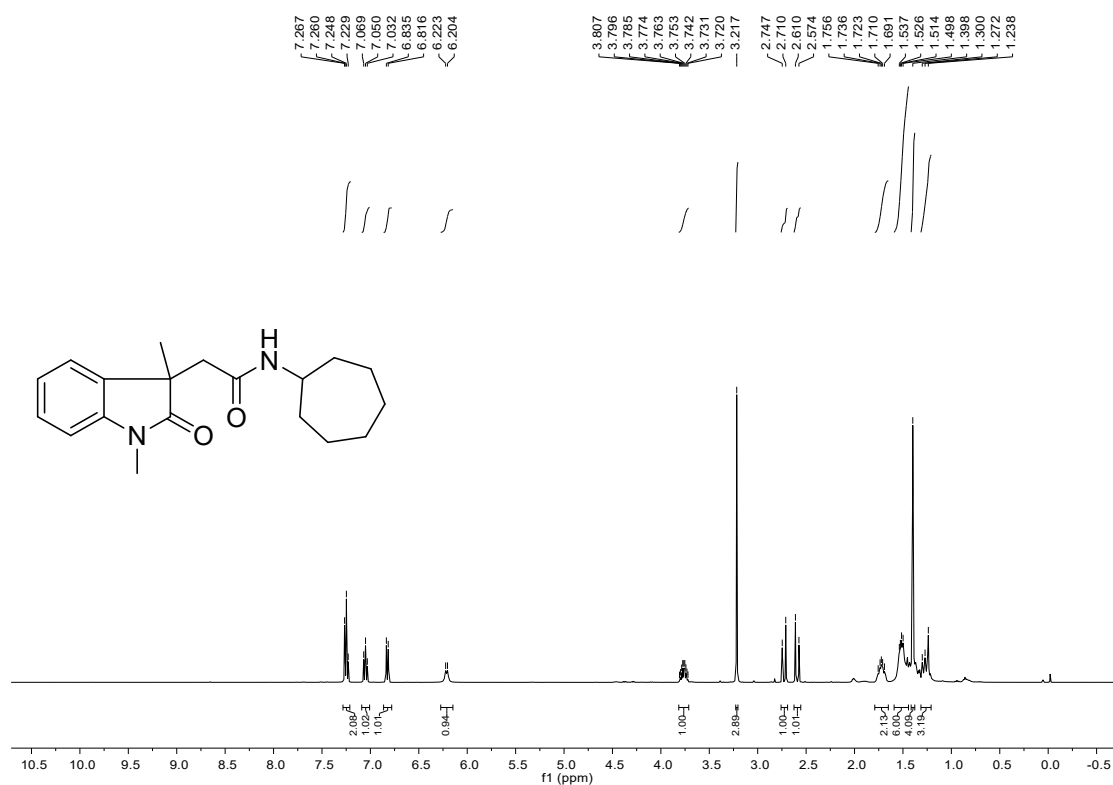

<sup>1</sup>H NMR (400 MHz, CDCl<sub>3</sub>) spectra of **3g**

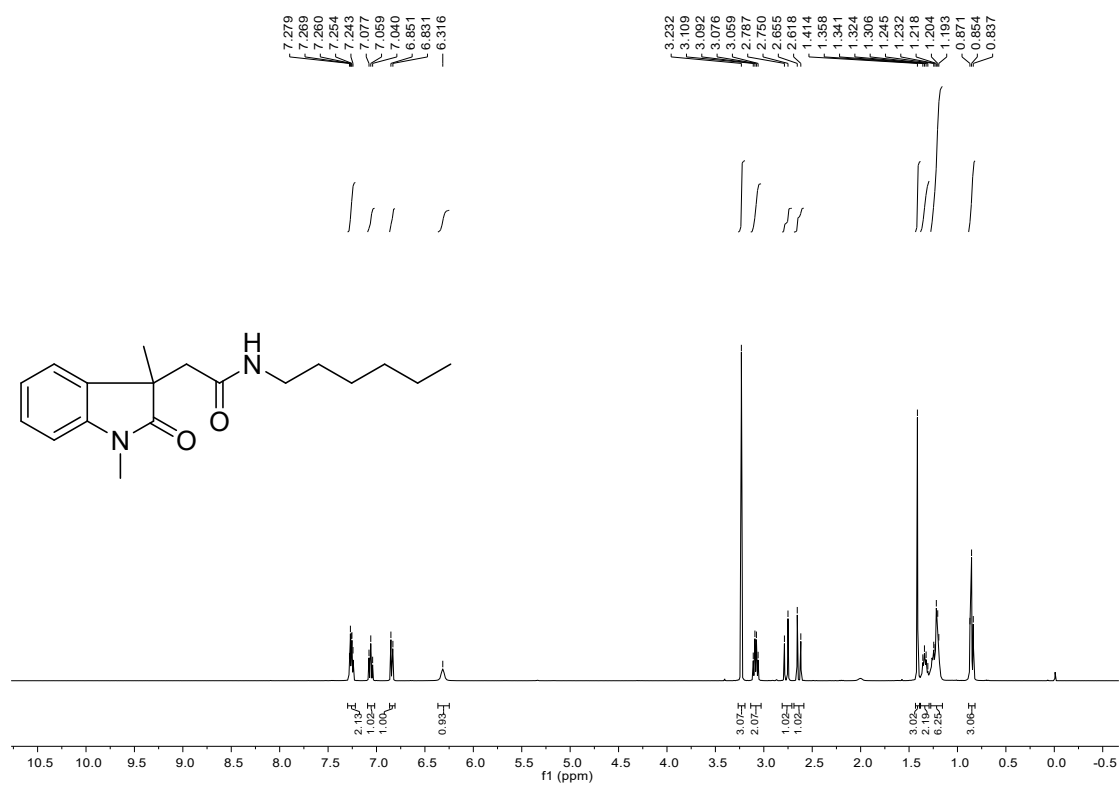

<sup>1</sup>H NMR (400 MHz, CDCl<sub>3</sub>) spectra of **3h**

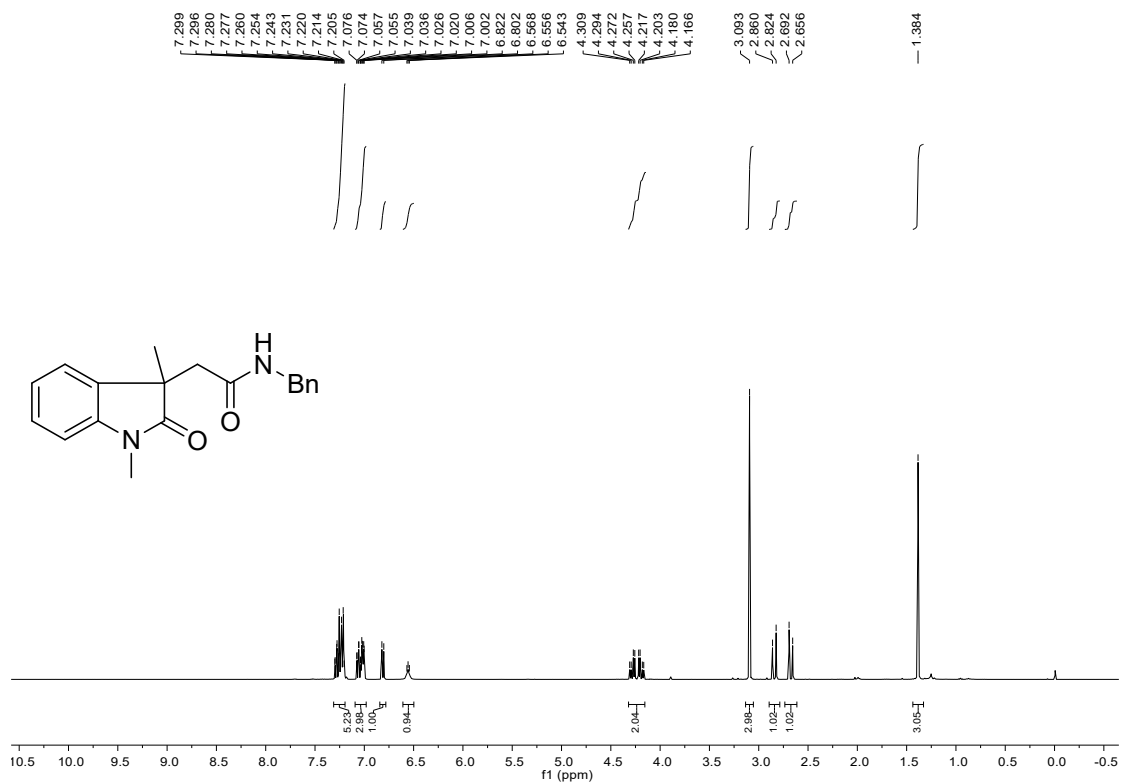

<sup>1</sup>H NMR (400 MHz, CDCl<sub>3</sub>) spectra of **3i**

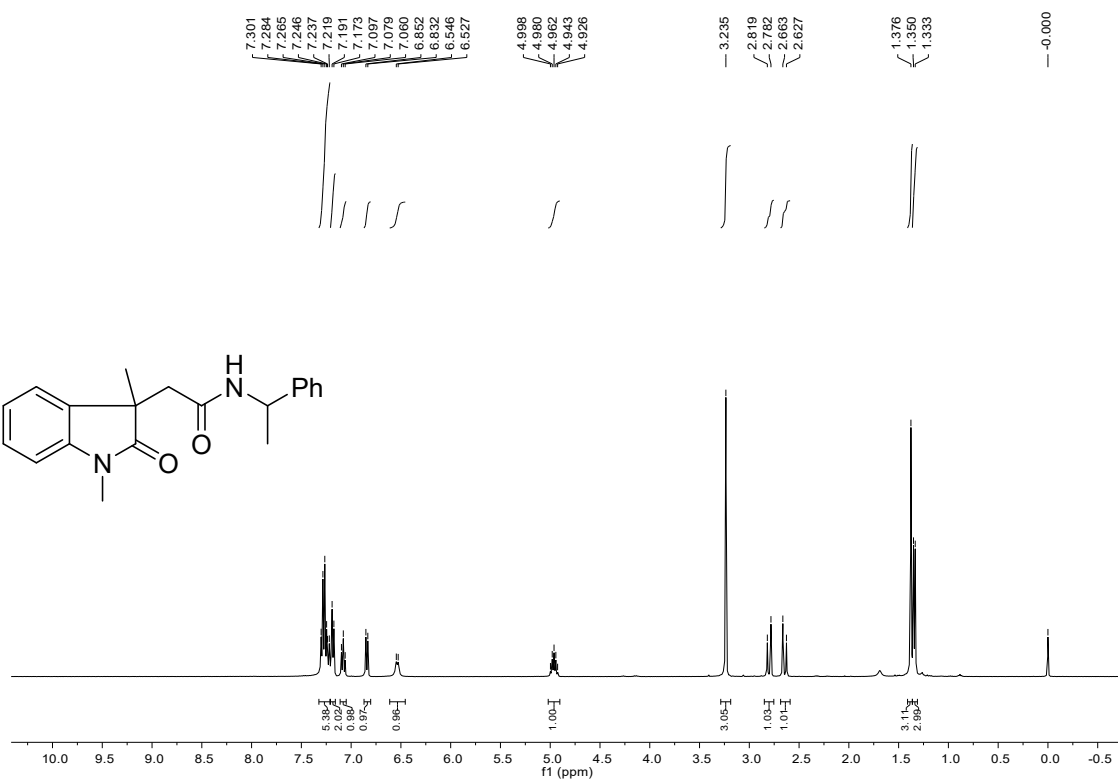

### <sup>1</sup>H NMR (400 MHz, CDCl<sub>3</sub>) spectra of **3j**

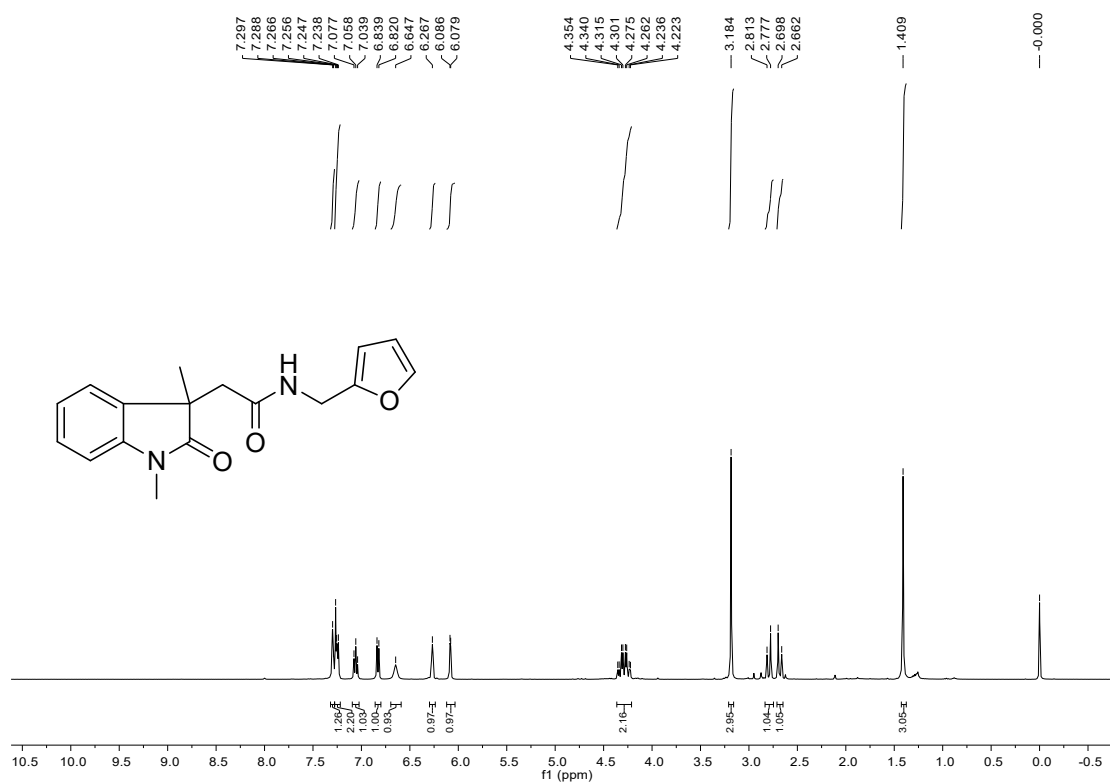

### <sup>13</sup>C NMR (100 MHz, CDCl<sub>3</sub>) spectra of **3j**

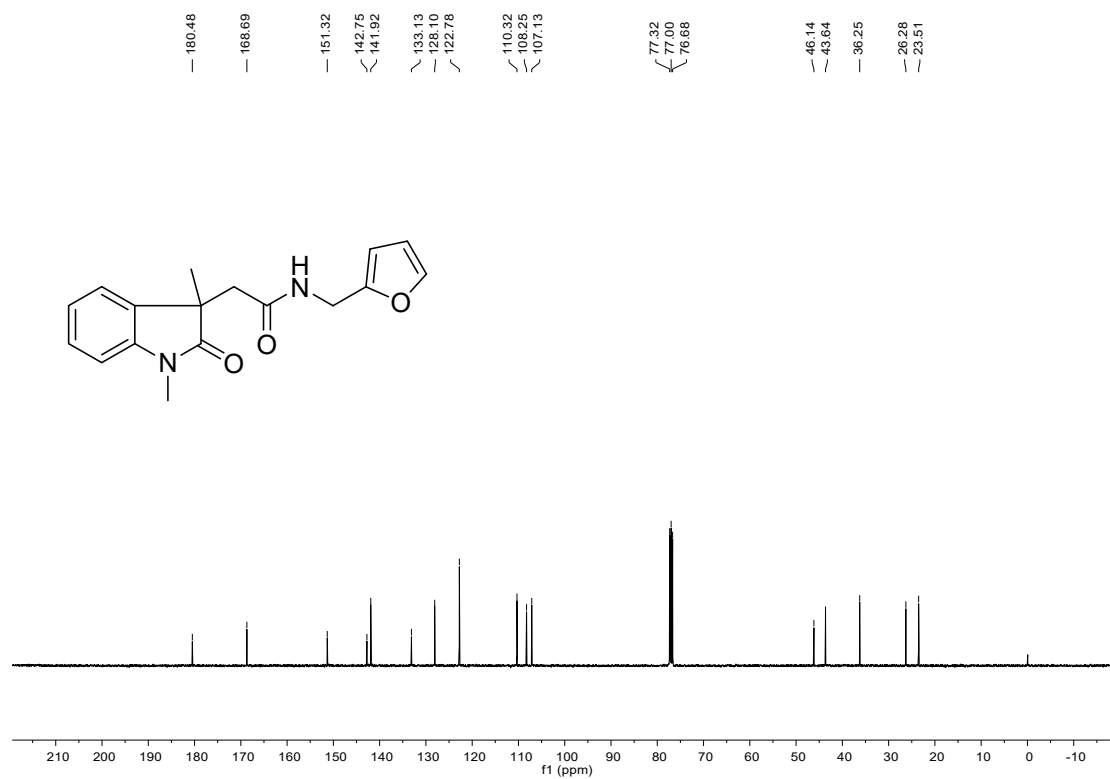

<sup>1</sup>H NMR (400 MHz, CDCl<sub>3</sub>) spectra of **3k**

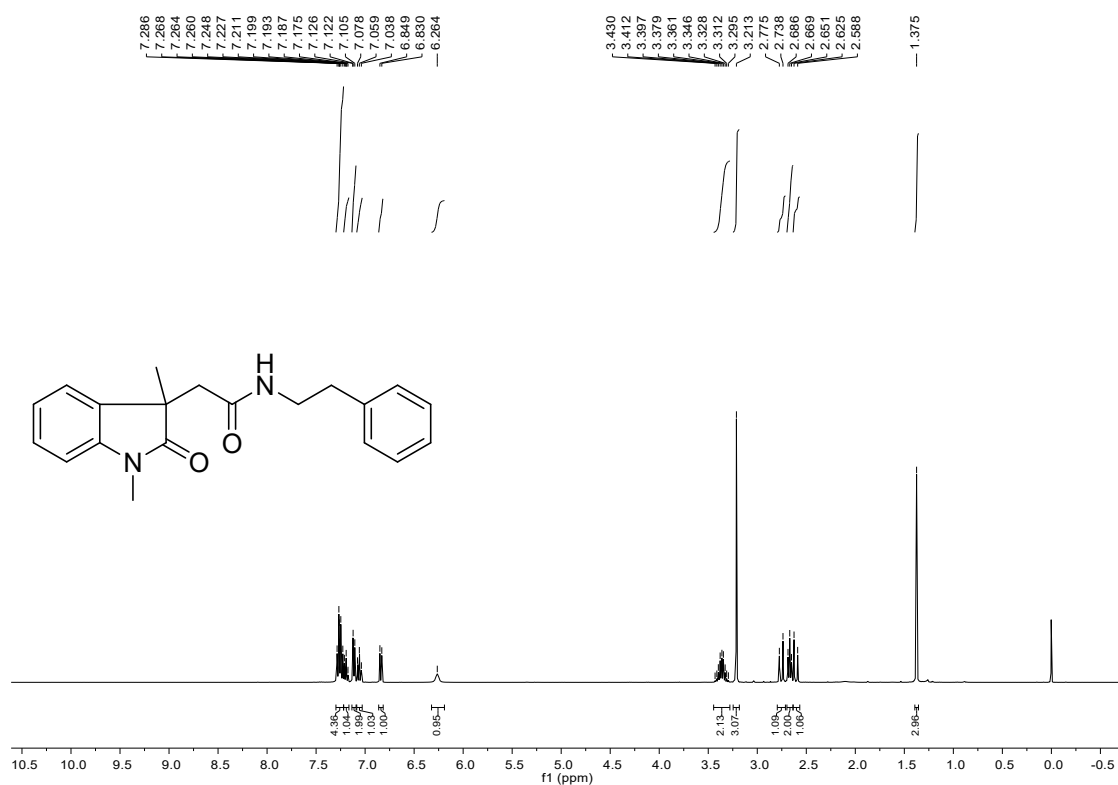

<sup>1</sup>H NMR (400 MHz, CDCl<sub>3</sub>) spectra of **3l**

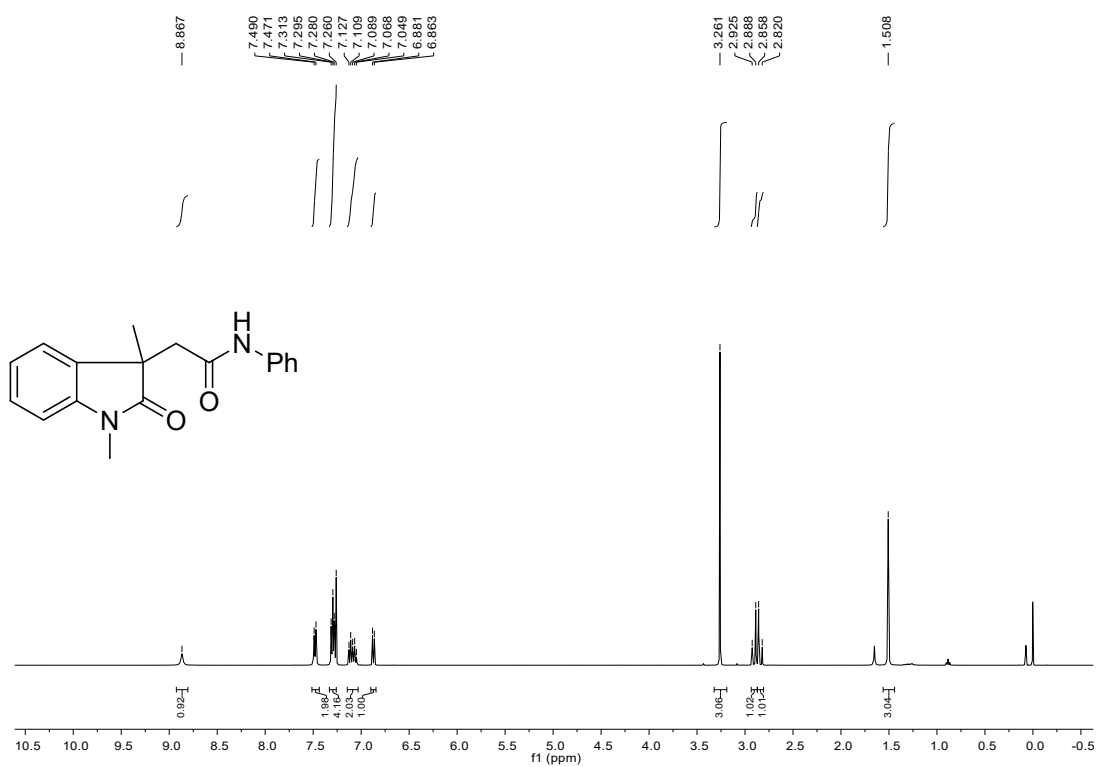

<sup>1</sup>H NMR (400 MHz, CDCl<sub>3</sub>) spectra of **3m**

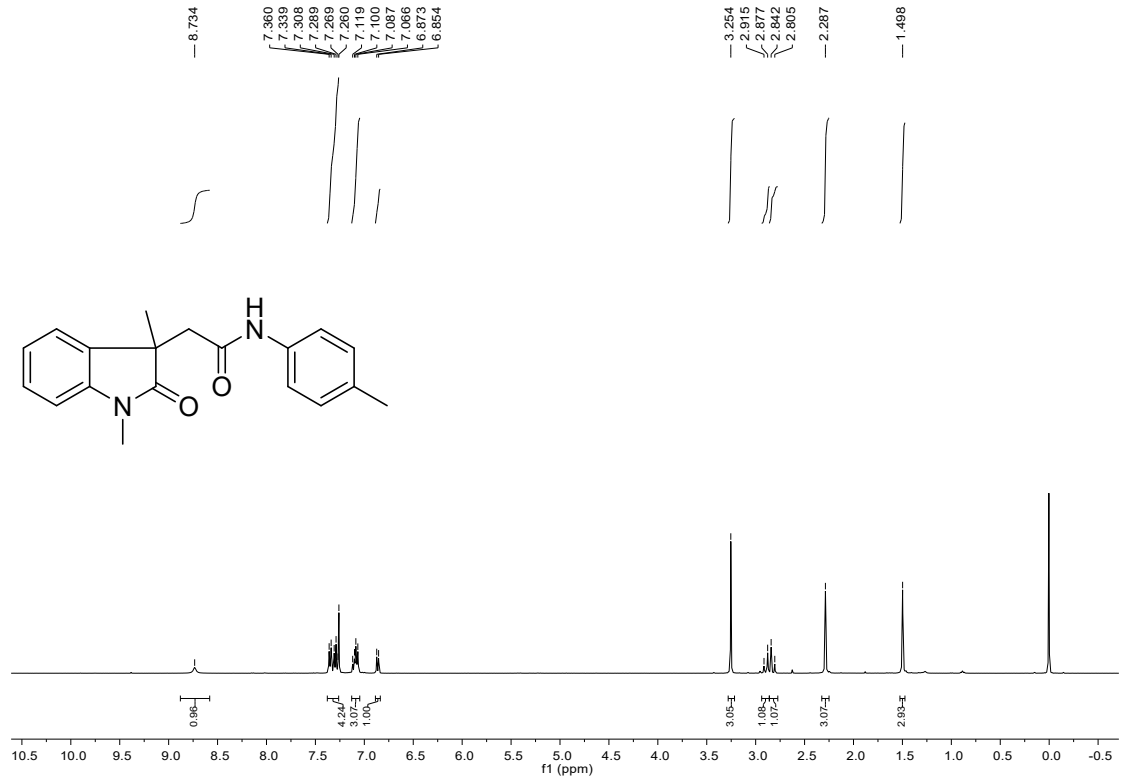

<sup>1</sup>H NMR (400 MHz, CDCl<sub>3</sub>) spectra of **3n**

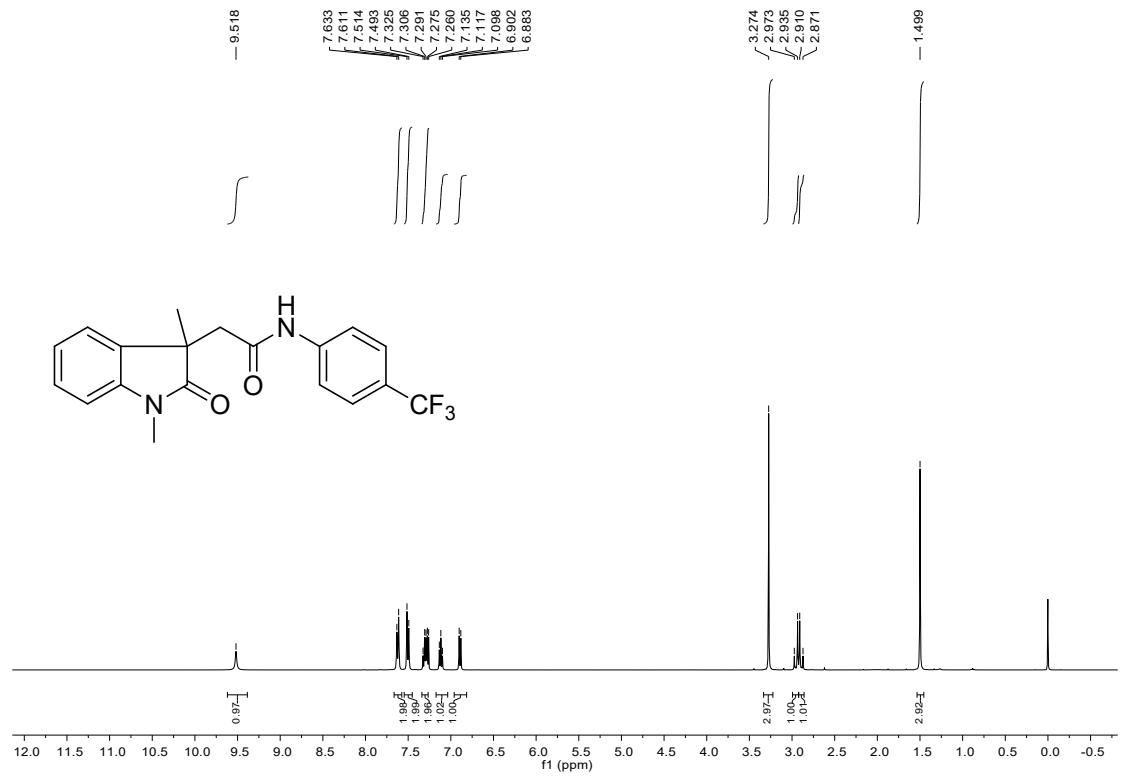

<sup>1</sup>H NMR (400 MHz, CDCl<sub>3</sub>) spectra of **3o**

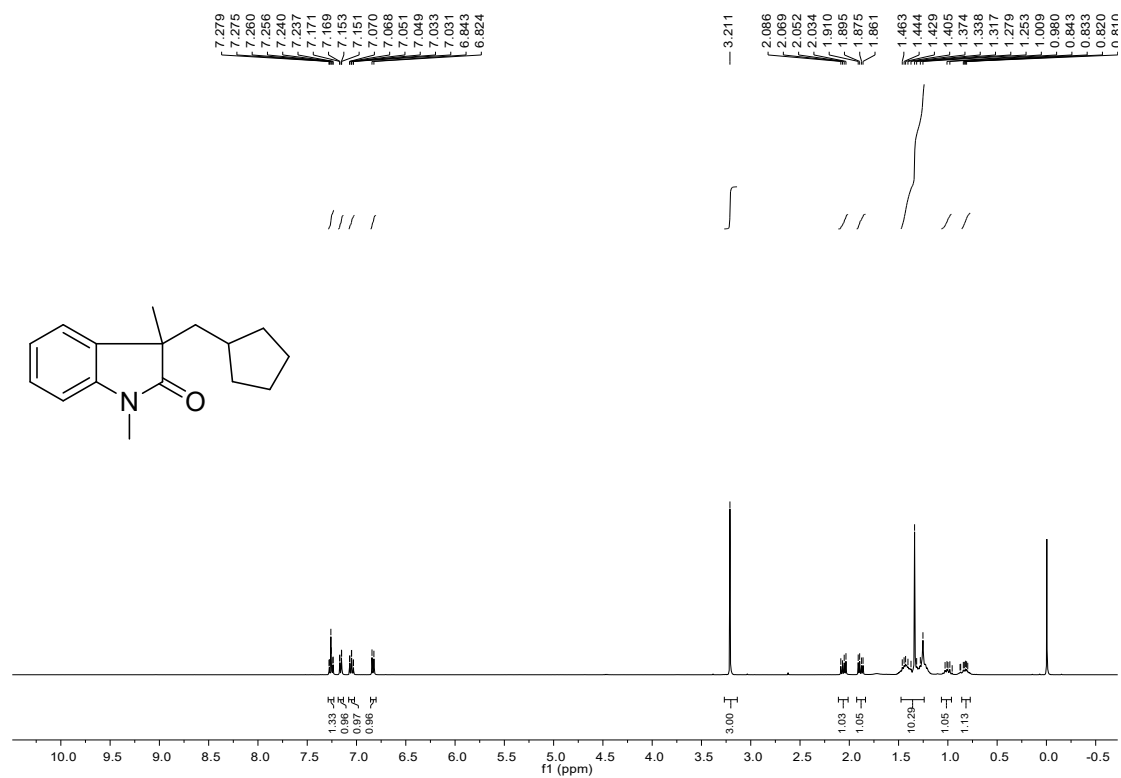

<sup>1</sup>H NMR (400 MHz, CDCl<sub>3</sub>) spectra of **3p**

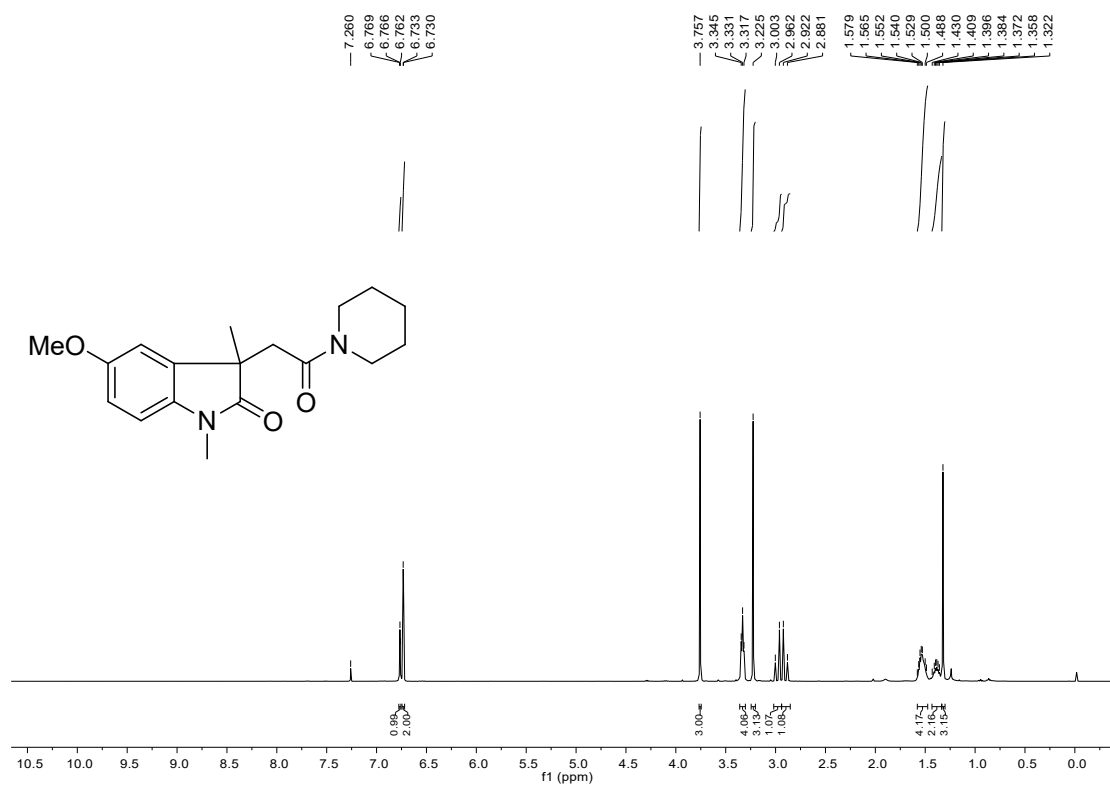

<sup>13</sup>C NMR (100 MHz, CDCl<sub>3</sub>) spectra of **3p**

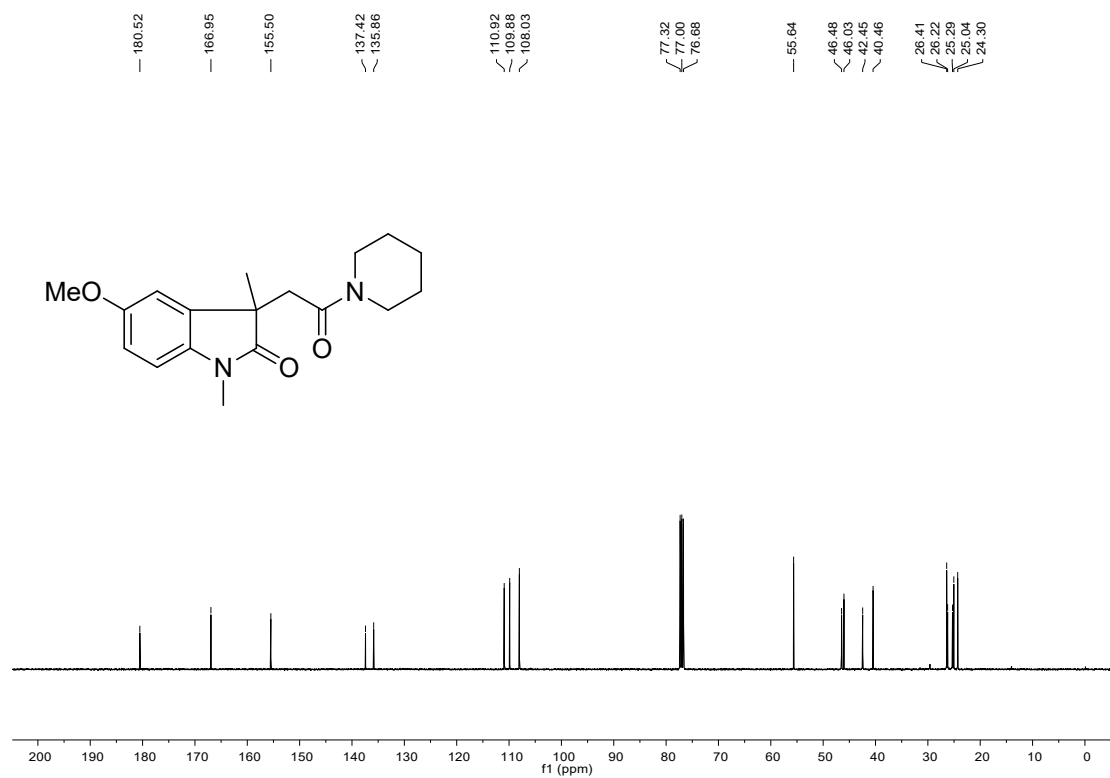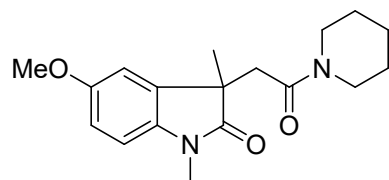

<sup>1</sup>H NMR (400 MHz, CDCl<sub>3</sub>) spectra of **3q**

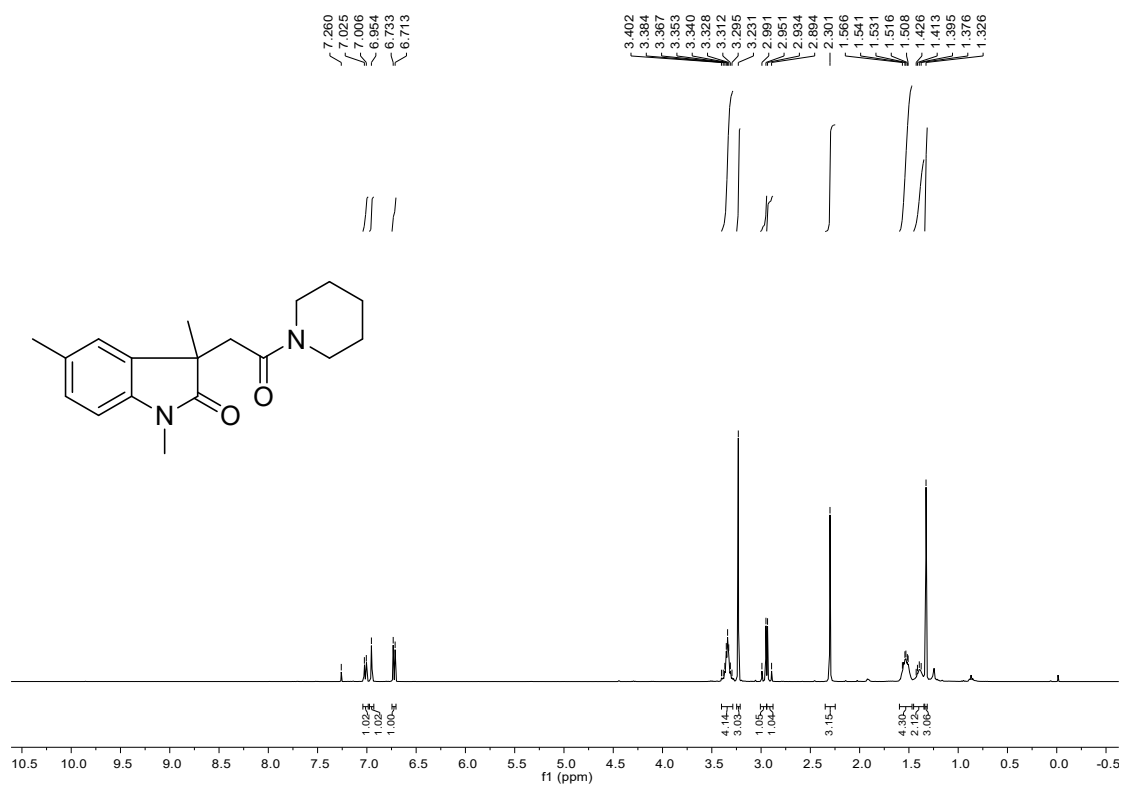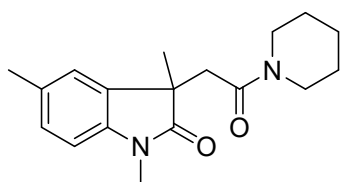



<sup>1</sup>H NMR (400 MHz, CDCl<sub>3</sub>) spectra of **3r**

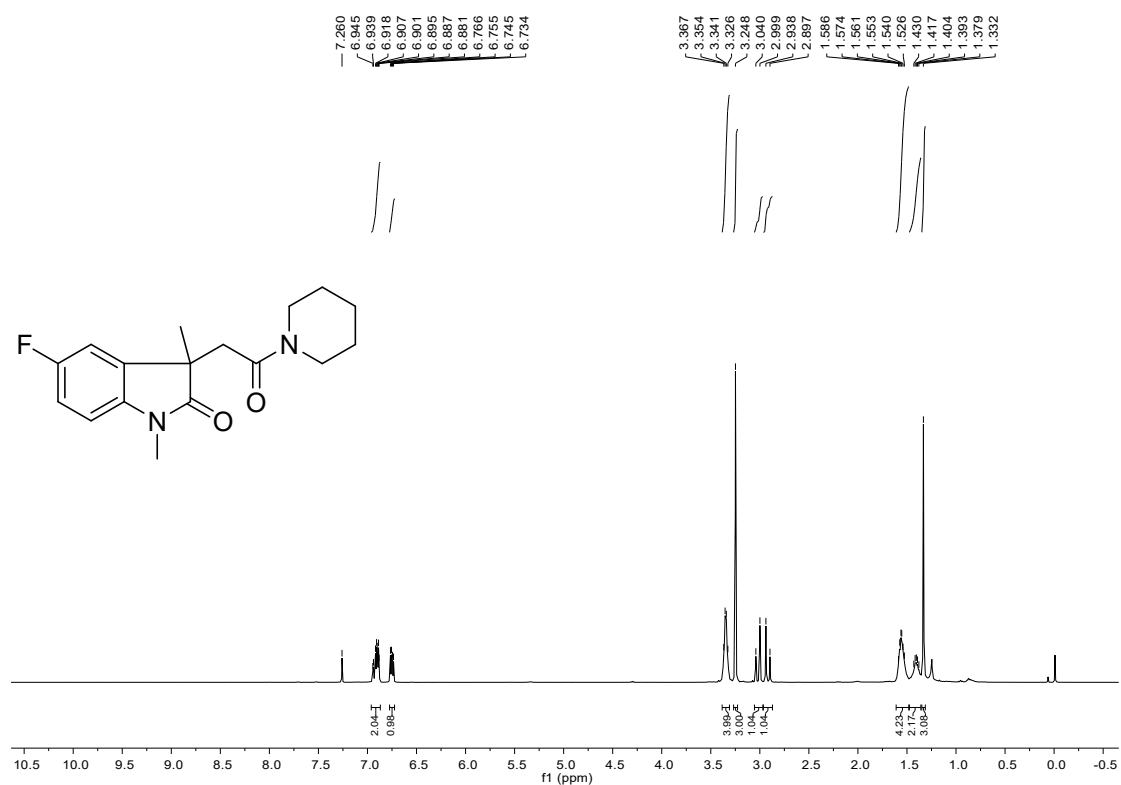

<sup>19</sup>F NMR (376 MHz, CDCl<sub>3</sub>) spectra of **3r**

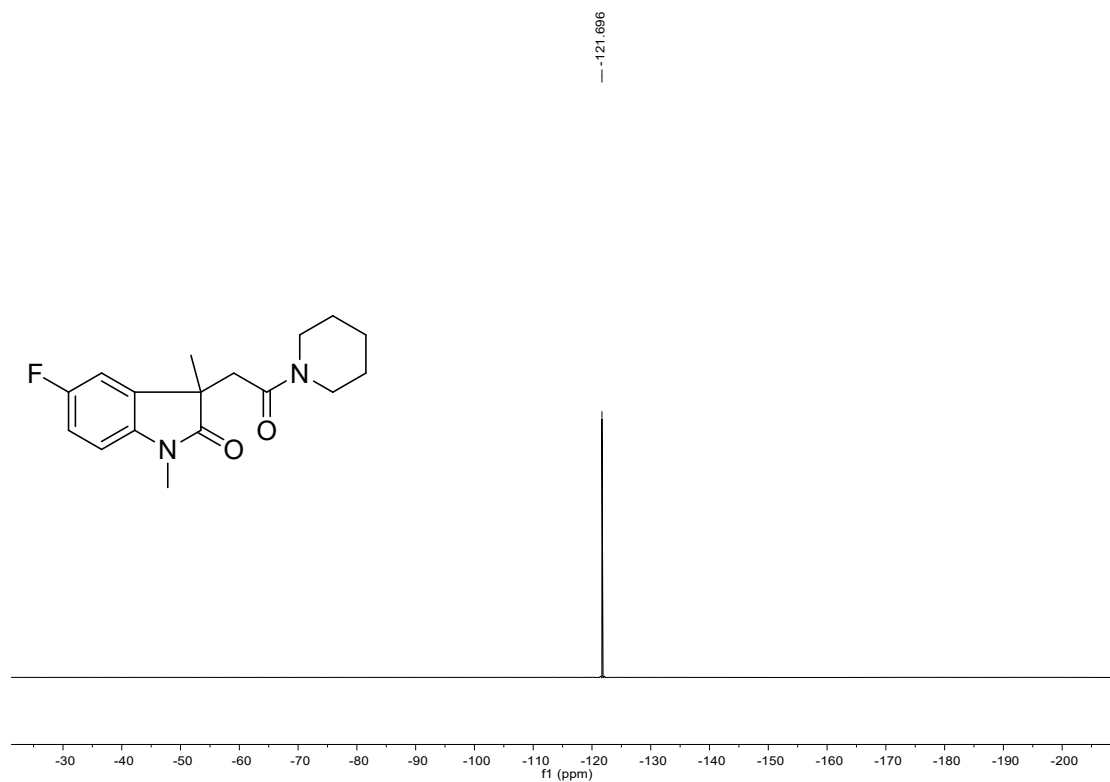

<sup>1</sup>H NMR (400 MHz, CDCl<sub>3</sub>) spectra of **3s**

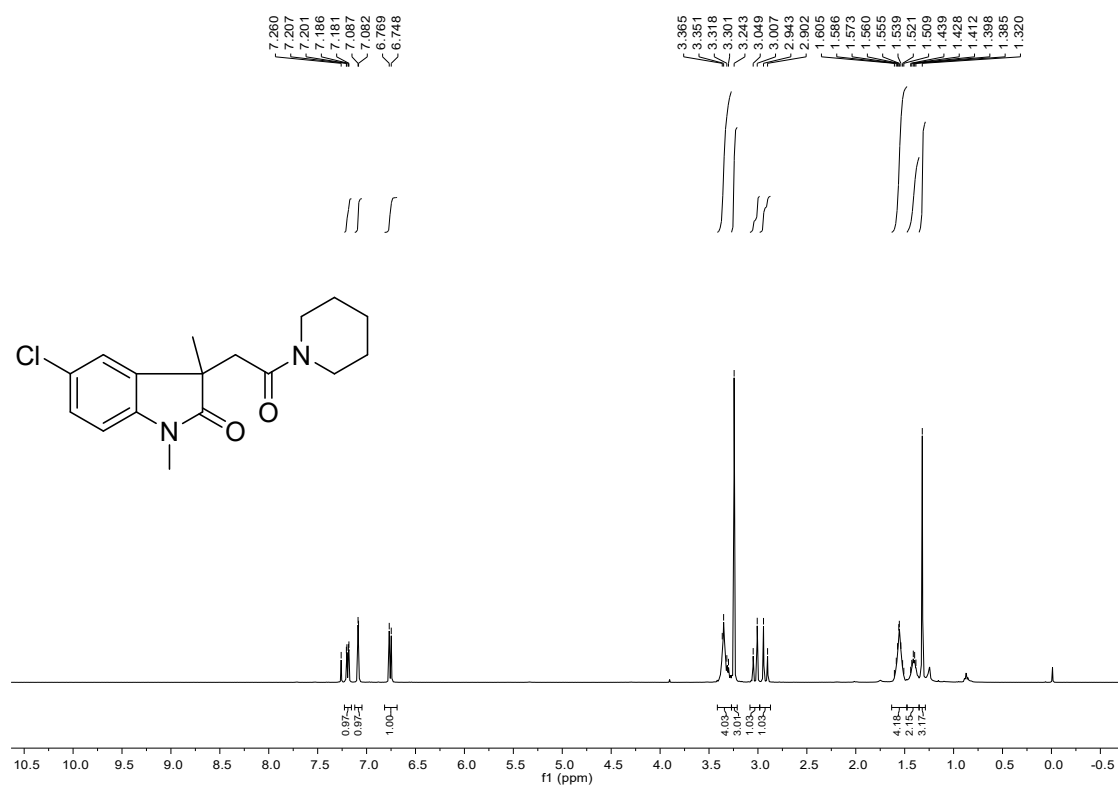

<sup>1</sup>H NMR (400 MHz, CDCl<sub>3</sub>) spectra of **3u**

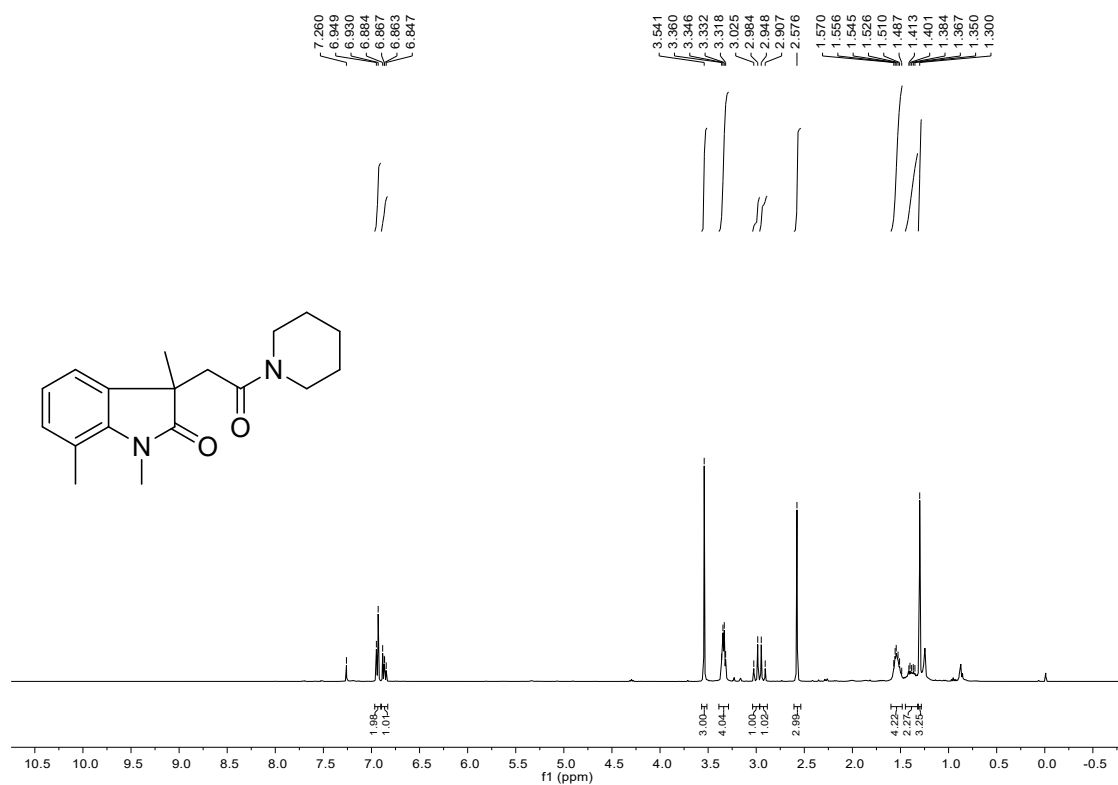

<sup>1</sup>H NMR (400 MHz, CDCl<sub>3</sub>) spectra of **3v+3v'**

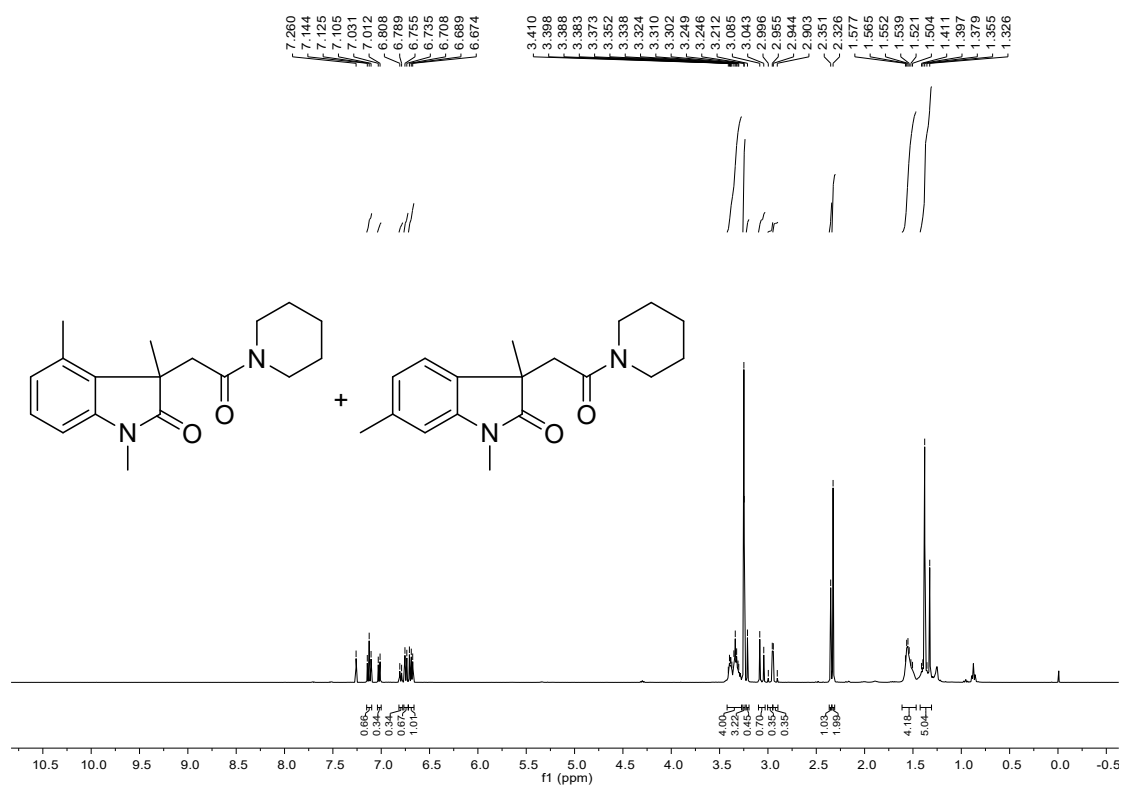

<sup>1</sup>H NMR (400 MHz, CDCl<sub>3</sub>) spectra of **3w**

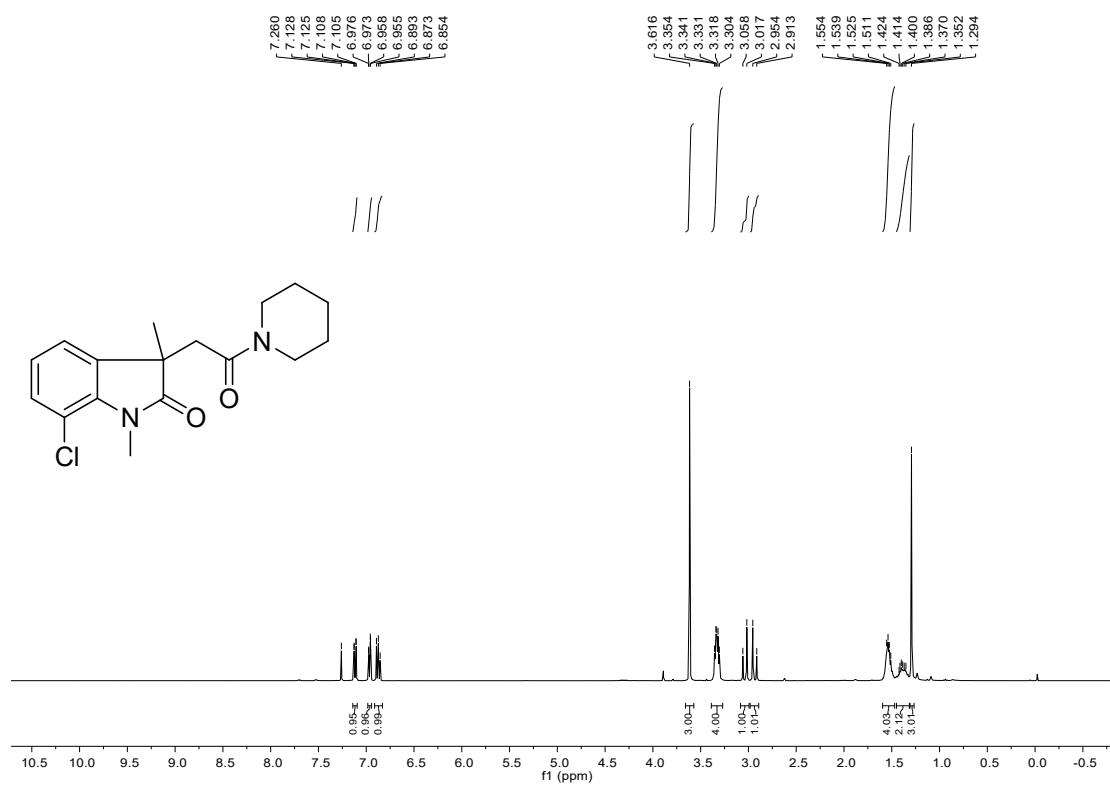

<sup>1</sup>H NMR (400 MHz, CDCl<sub>3</sub>) spectra of **3x** + **3x'**

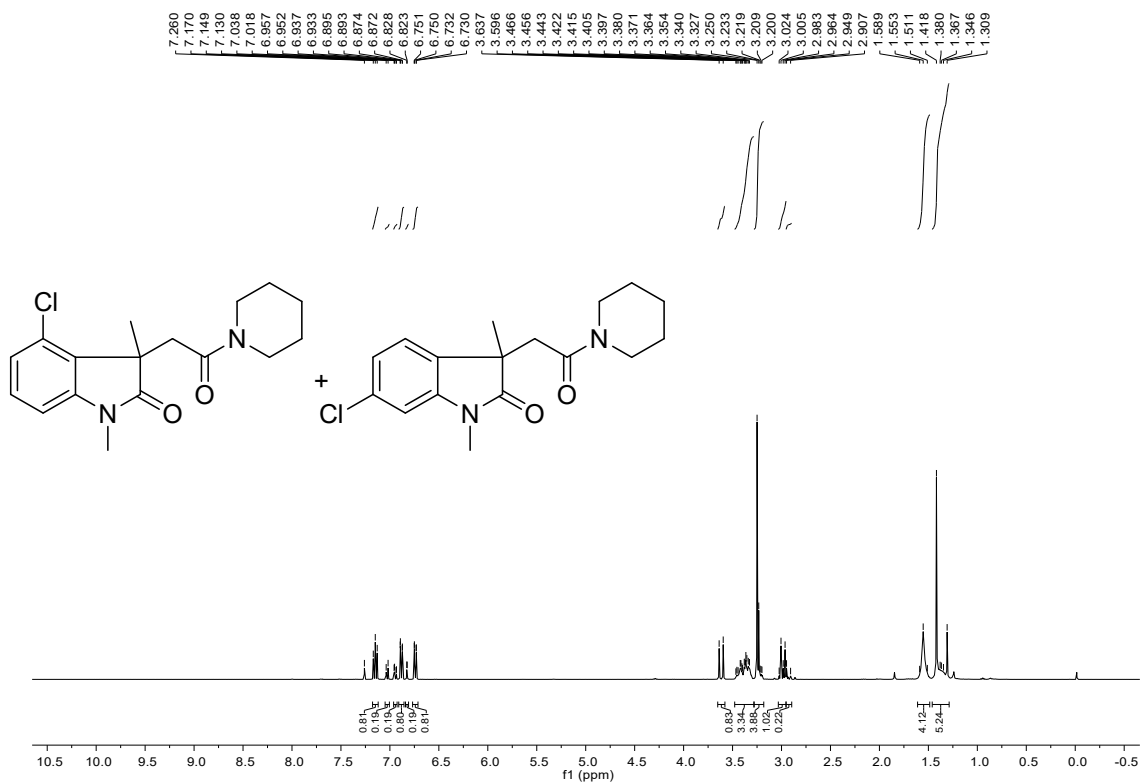

<sup>1</sup>H NMR (400 MHz, CDCl<sub>3</sub>) spectra of **3y**

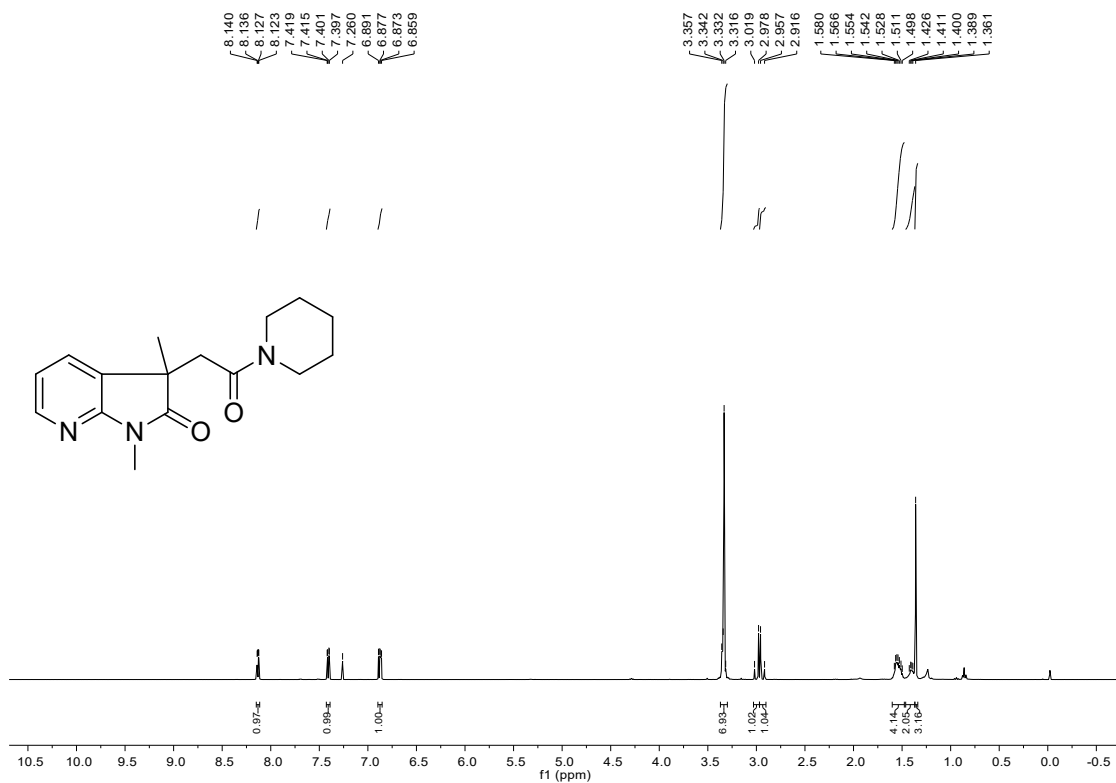

### <sup>1</sup>H NMR (400 MHz, CDCl<sub>3</sub>) spectra of **3z**

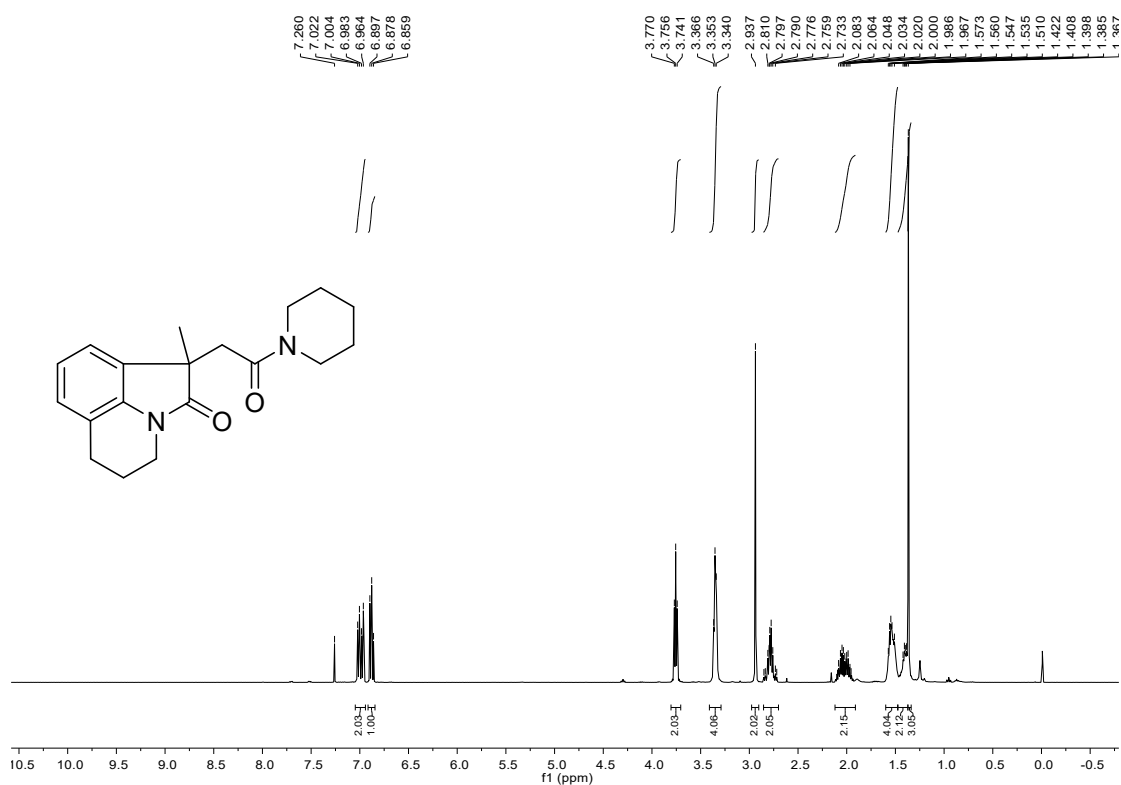

### <sup>13</sup>C NMR (100 MHz, CDCl<sub>3</sub>) spectra of **3z**

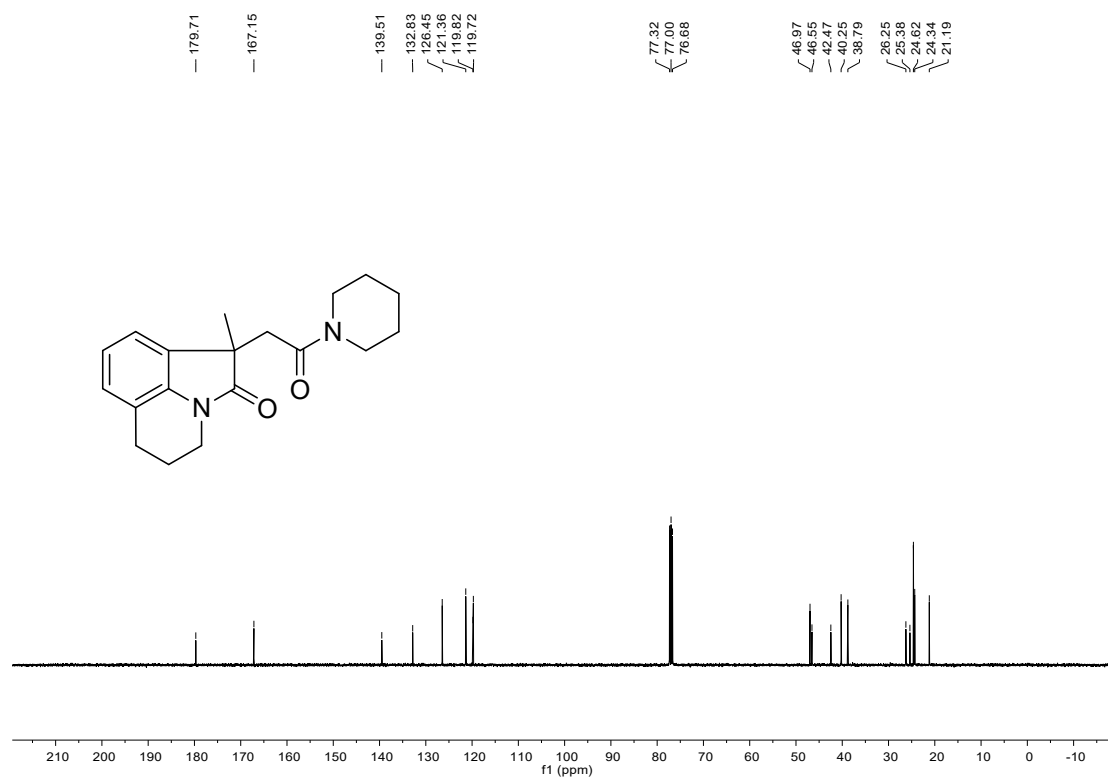

<sup>1</sup>H NMR (400 MHz, CDCl<sub>3</sub>) spectra of **3ab**

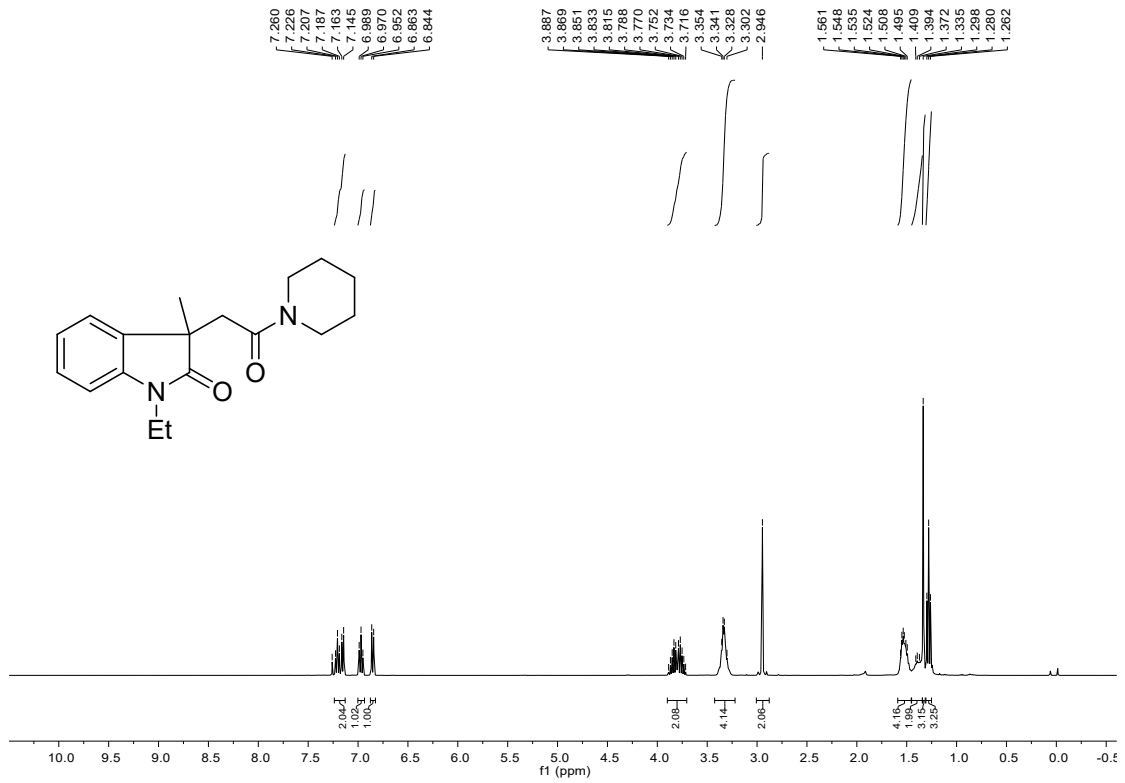

<sup>1</sup>H NMR (400 MHz, CDCl<sub>3</sub>) spectra of **3ac**

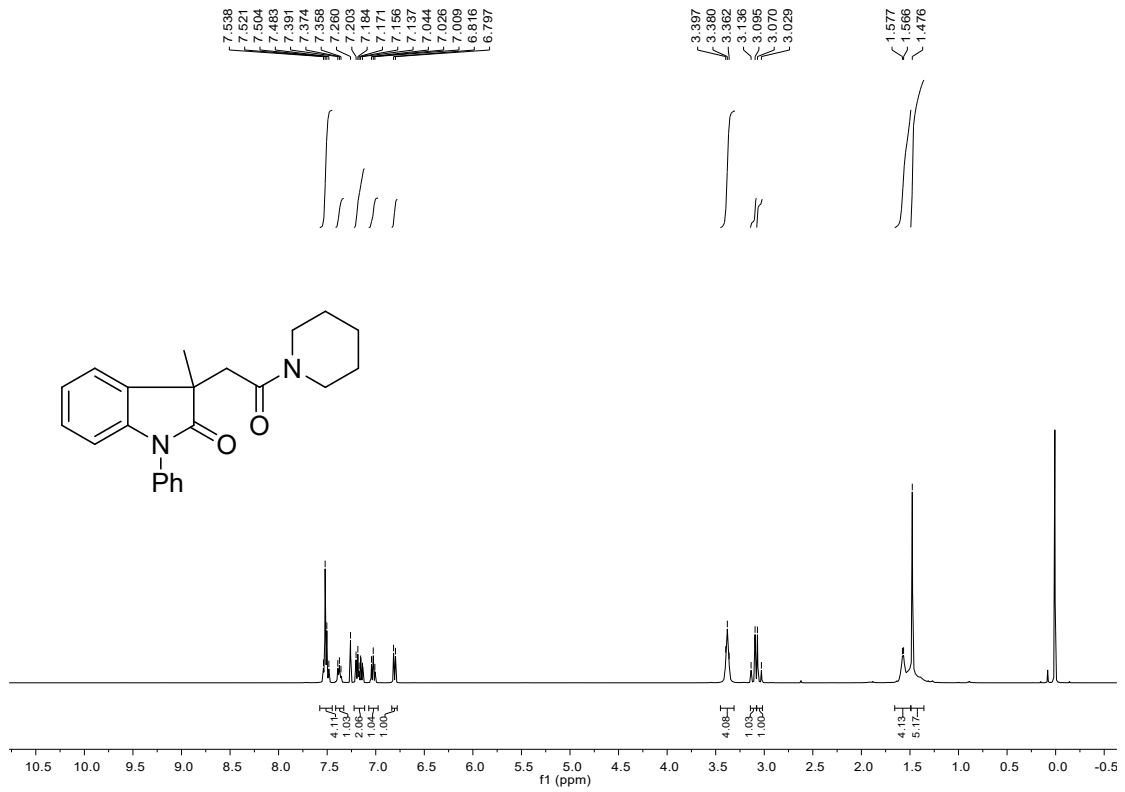

<sup>1</sup>H NMR (400 MHz, CDCl<sub>3</sub>) spectra of **3ad**

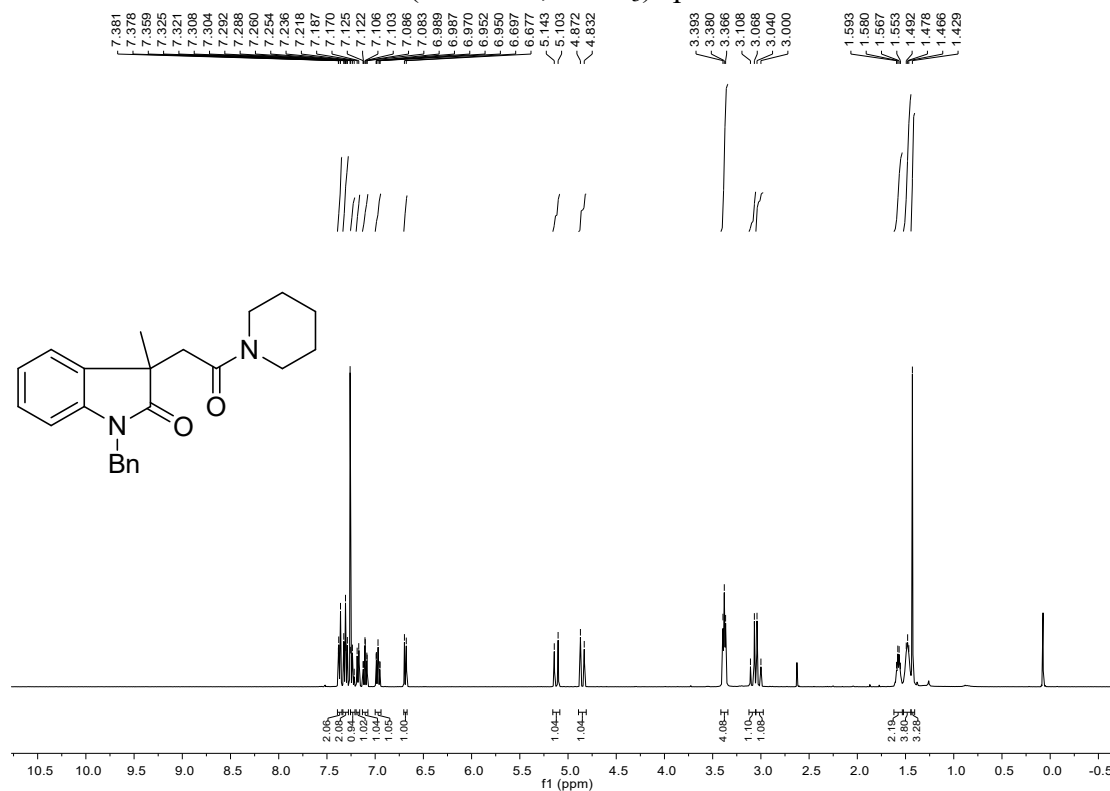

<sup>1</sup>H NMR (400 MHz, CDCl<sub>3</sub>) spectra of **5a**

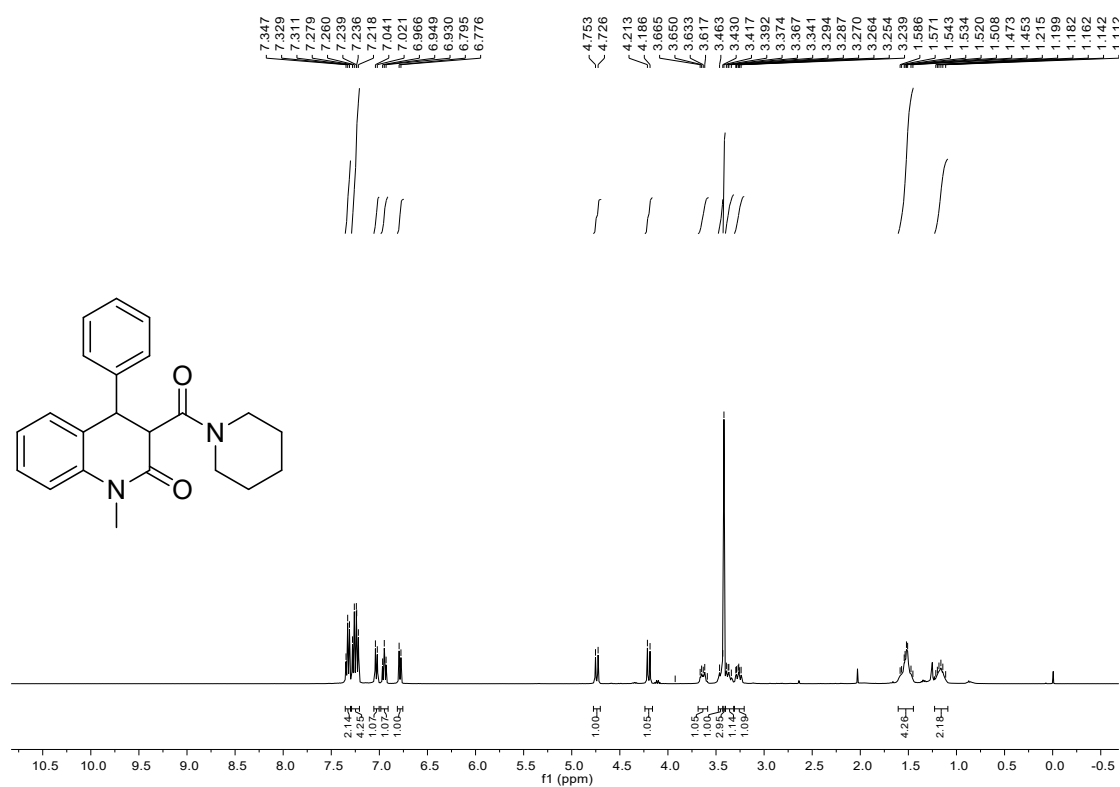

<sup>13</sup>C NMR (100 MHz, CDCl<sub>3</sub>) spectra of **5a**

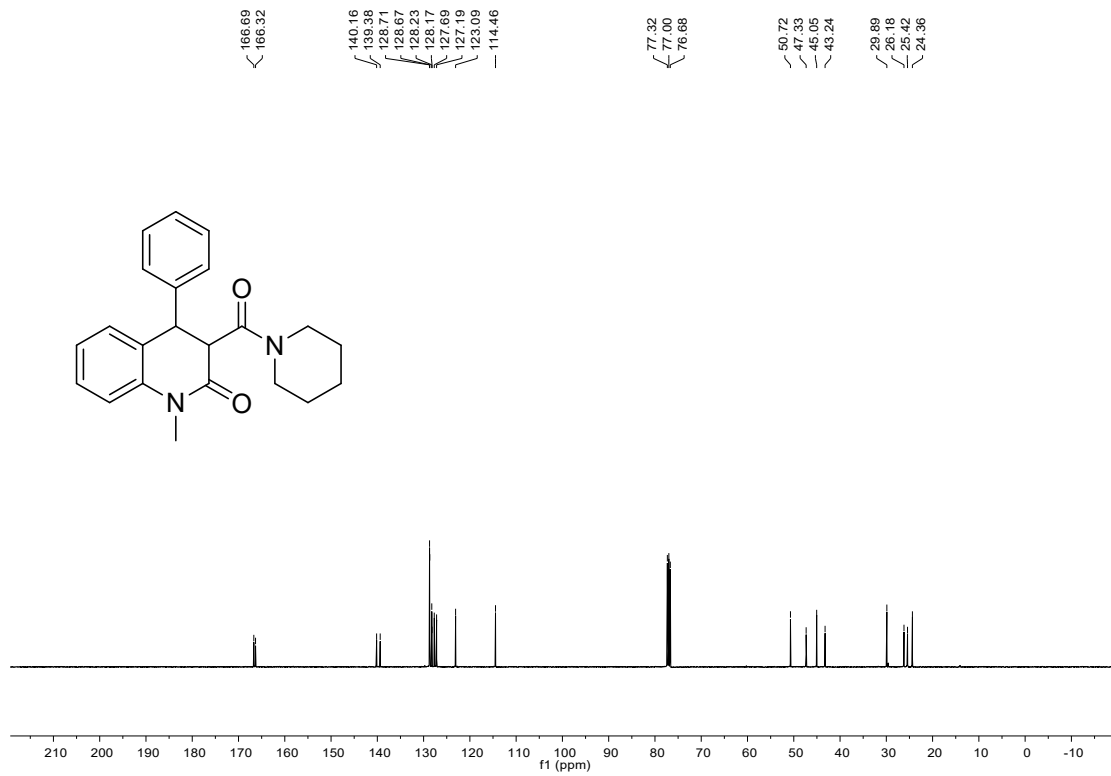

<sup>1</sup>H NMR (400 MHz, CDCl<sub>3</sub>) spectra of **5b**

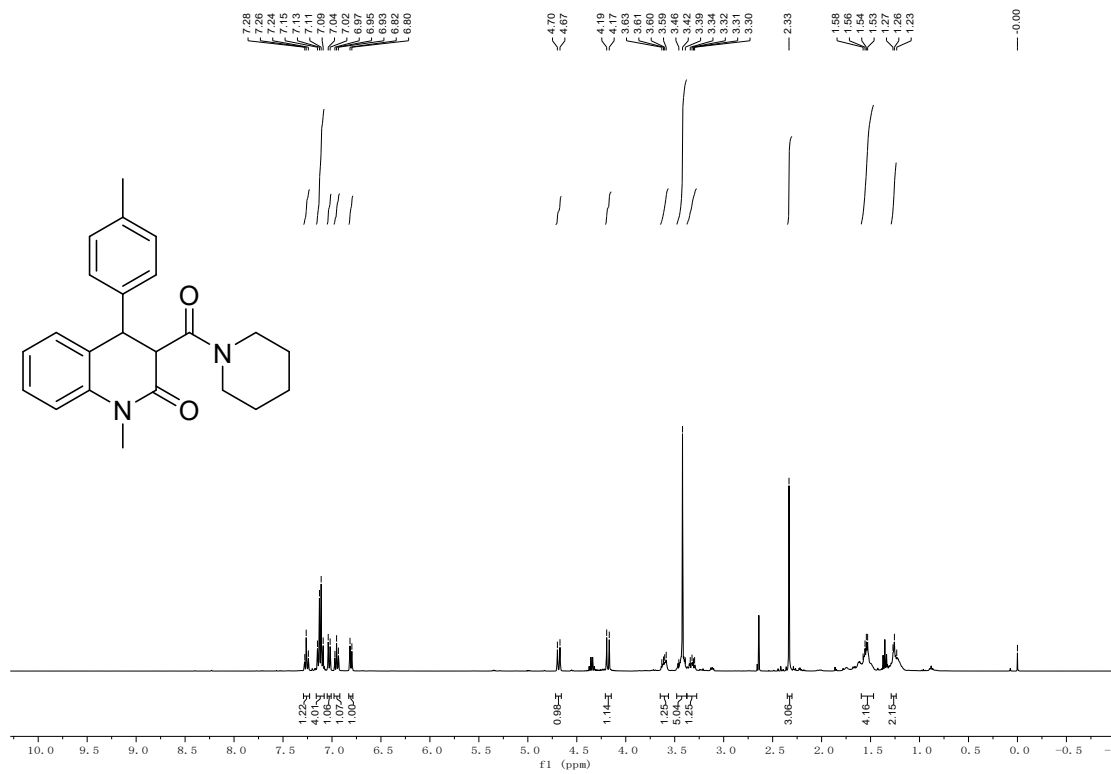



<sup>13</sup>C NMR (100 MHz, CDCl<sub>3</sub>) spectra of **5b**

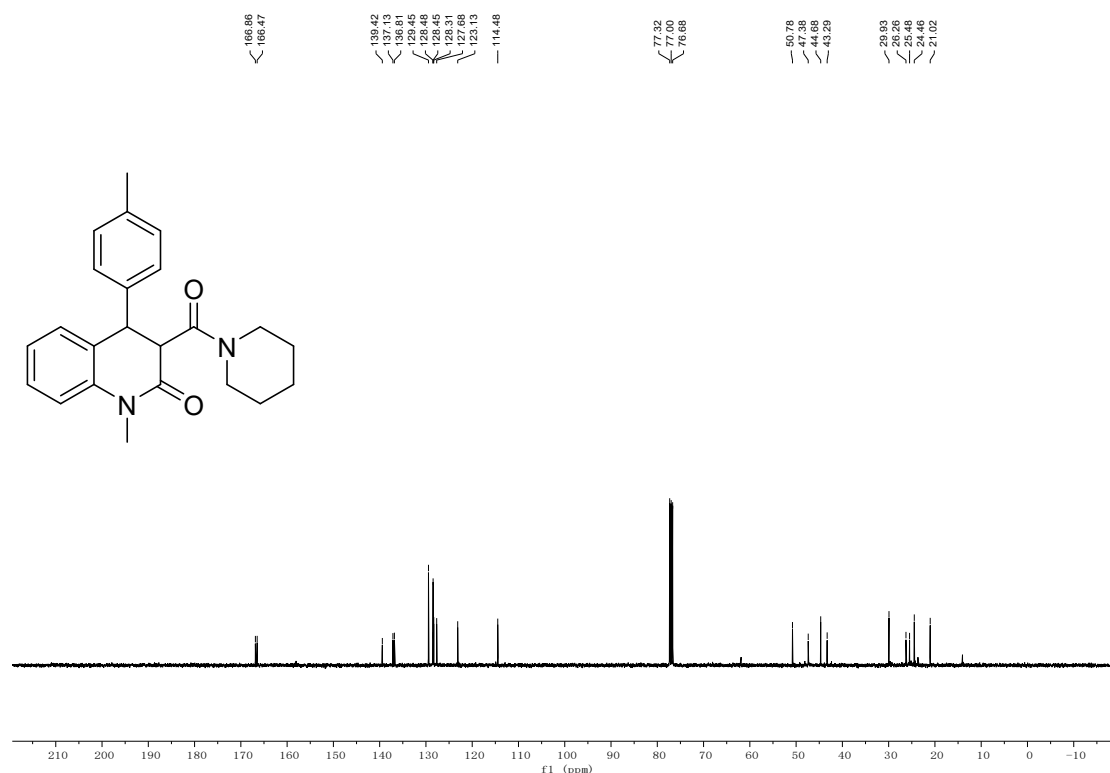

<sup>1</sup>H NMR (400 MHz, CDCl<sub>3</sub>) spectra of **5c**

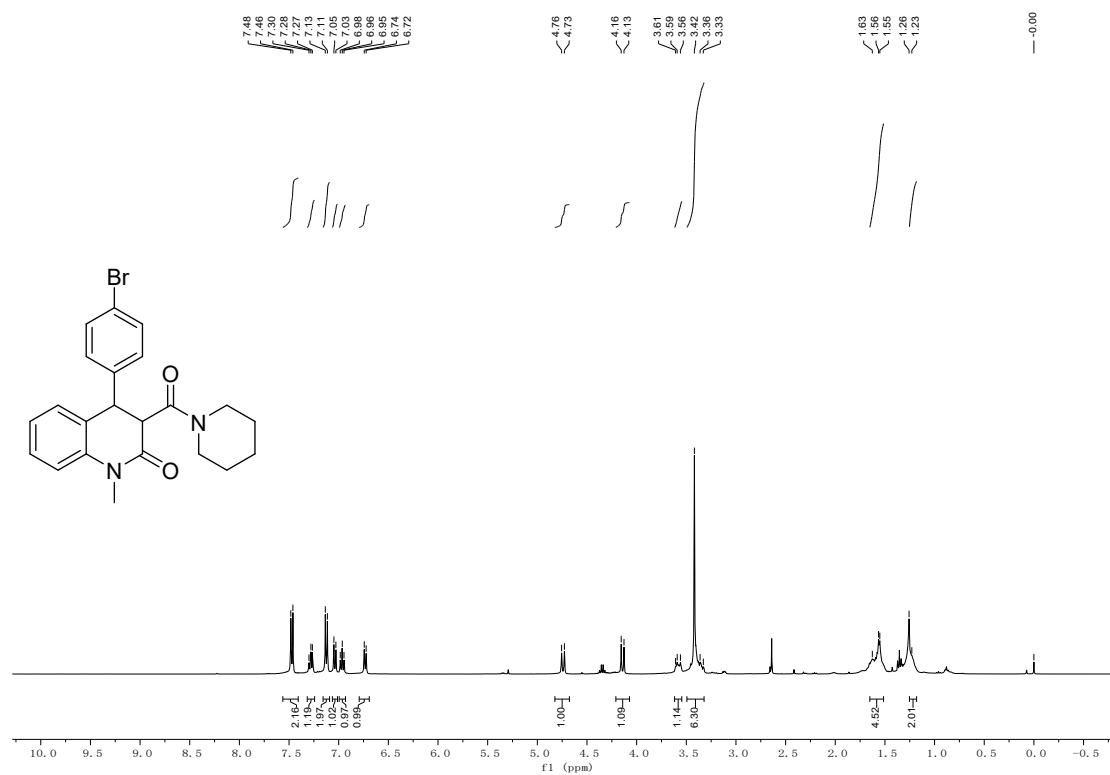

<sup>13</sup>C NMR (100 MHz, CDCl<sub>3</sub>) spectra of **5c**

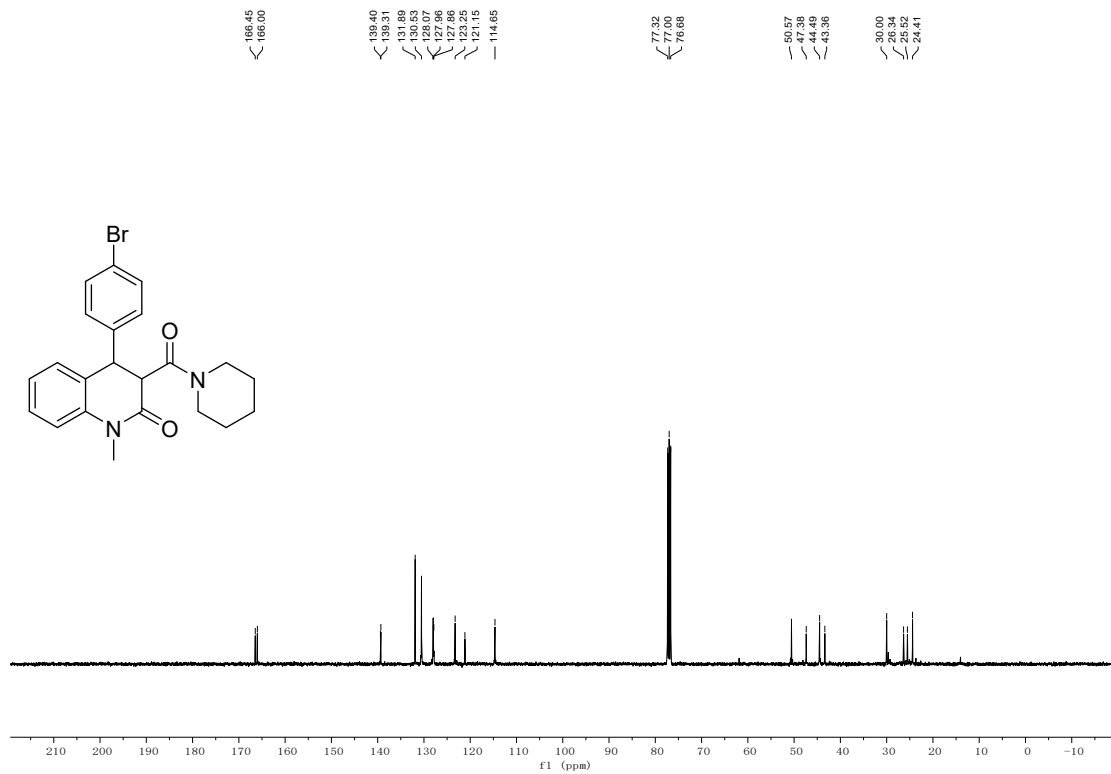

<sup>1</sup>H NMR (400 MHz, CDCl<sub>3</sub>) spectra of **5d**

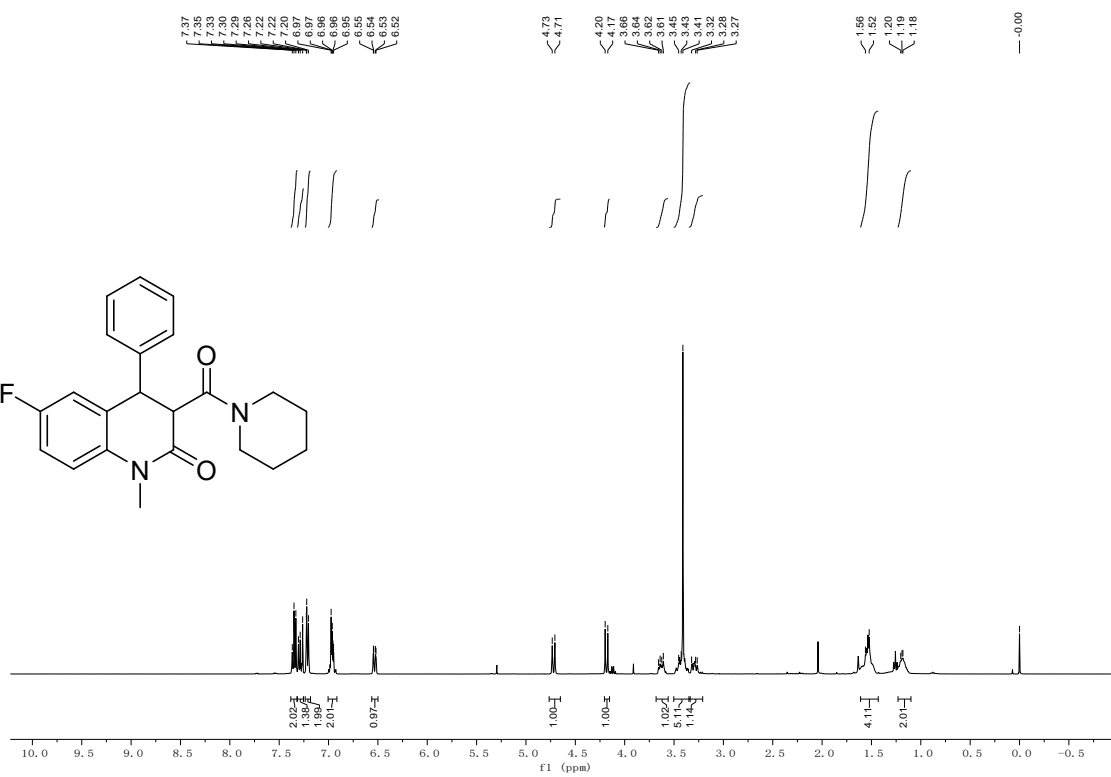

<sup>13</sup>C NMR (100 MHz, CDCl<sub>3</sub>) spectra of **5d**

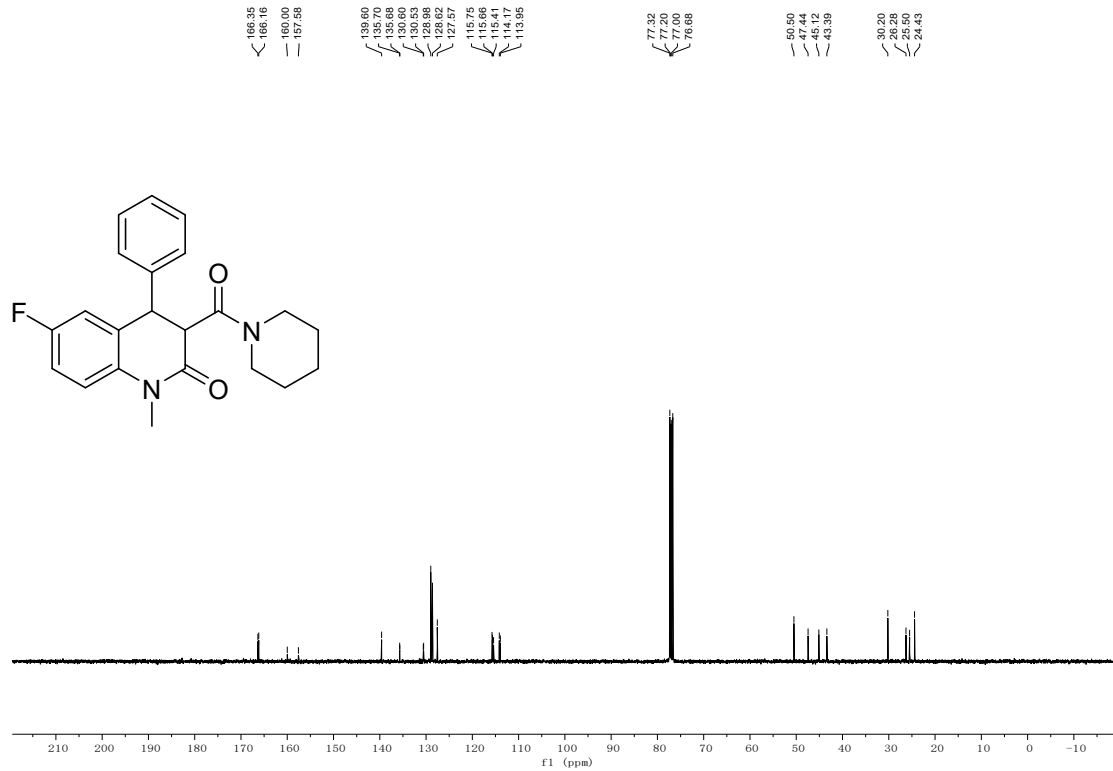

<sup>1</sup>H NMR (400 MHz, CDCl<sub>3</sub>) spectra of **5e**

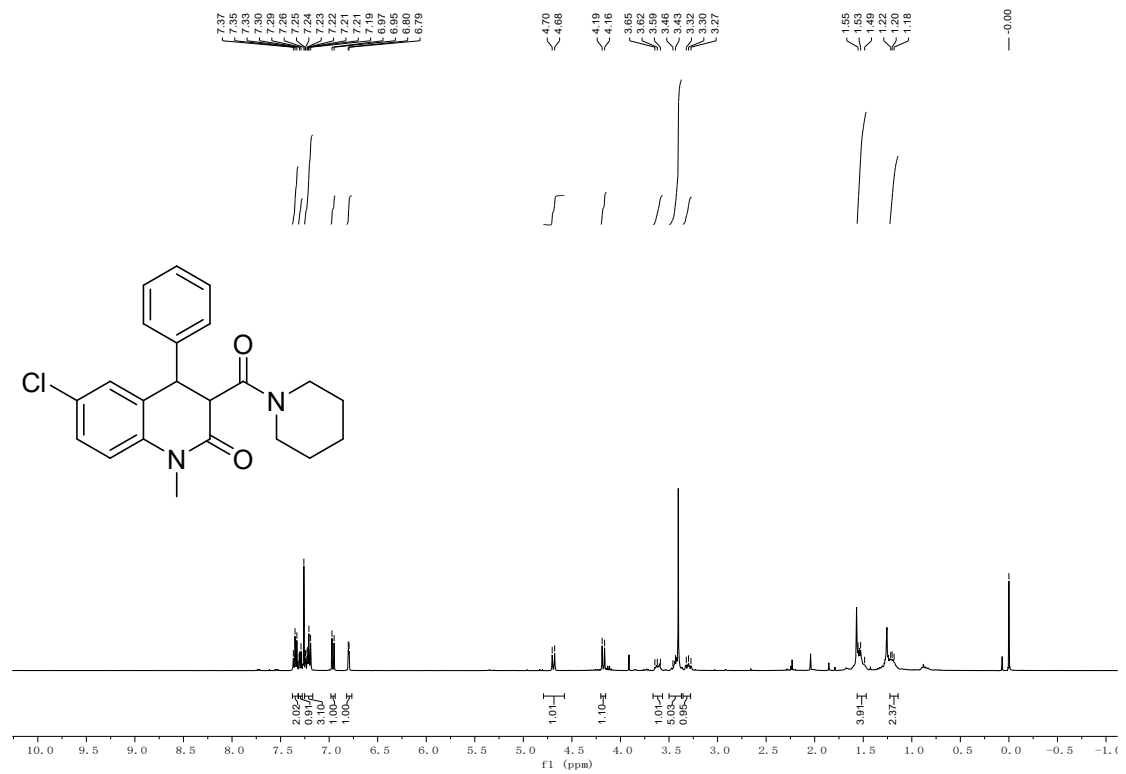

<sup>13</sup>C NMR (100 MHz, CDCl<sub>3</sub>) spectra of **5e**

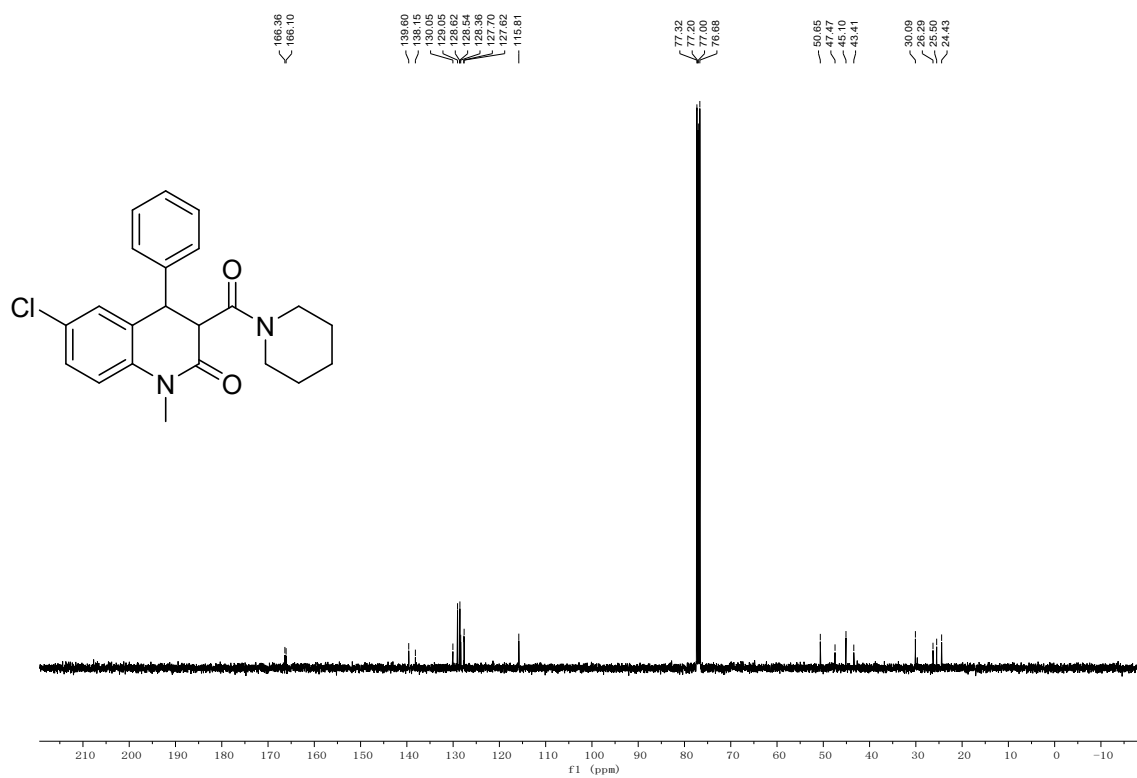

Supplement: d3ob01240a1.pdf [file d3ob01240a1.pdf]
